# Supplementary material for: Whole-Exome Sequencing, Proteome Landscape, and Immune Cell Migration Patterns in a Clinical Context of Menkes Disease
Source: MDPI journal article supplement (doi:10.3390/genes12050744), 2021-05-14
Supplement: s1 [file s1]

-Supplementary Material-

# Whole-exome sequencing, proteome landscape, and immune cell migration patterns in a clinical context of Menkes disease

Margarita L Martinez-Fierro <sup>1,\*</sup>, Griselda A Cabral-Pacheco <sup>1</sup>, Idalia Garza-Veloz <sup>1</sup>, Jesus Acuña-Quíñones <sup>1</sup>, Laura E. Martinez-de-Villarreal <sup>2</sup>, Marisol Ibarra-Ramirez <sup>2</sup>, Joke Beuten <sup>3</sup>, Samantha E Sanchez-Guerrero <sup>4</sup>, Laura Villarreal-Martinez <sup>5</sup>, Ivan Delgado-Enciso <sup>6</sup>, Iram P Rodriguez-Sanchez <sup>7</sup>, Vania Z Zuñiga-Ramirez <sup>1</sup>, Edith Cardenas-Vargas <sup>2</sup>, and Viktor Romero-Diaz <sup>8</sup>

<sup>1</sup> Molecular Medicine Laboratory, Unidad Académica de Medicina Humana y C.S, Universidad Autónoma de Zacatecas, Carretera Zacatecas-Guadalajara Km.6. Ejido la Escondida, 98160, Zacatecas, Mexico; [margaritamf@uaz.edu.mx](mailto:margaritamf@uaz.edu.mx) (M.L.M.F); [gris\\_elda\\_ai91@hotmail.com](mailto:gris_elda_ai91@hotmail.com) (G.A.C.P); [idaligv@uaz.edu.mx](mailto:idaligv@uaz.edu.mx) (I.G.V); [jesusacunaquinones@gmail.com](mailto:jesusacunaquinones@gmail.com) (J.A.Q).

<sup>2</sup> Departamento de Genética. Universidad Autónoma de Nuevo León. Facultad de Medicina, 64460, Mexico; [laelmar@yahoo.com.mx](mailto:laelmar@yahoo.com.mx) (L.E.M.V); [m.ibarrar25@gmail.com](mailto:m.ibarrar25@gmail.com) (M.I.R).

<sup>3</sup> AiLife Diagnostics, 1920 Country Pl Pkwy Suite 100 Pearland (TX); [yokabeuten@hotmail.com](mailto:yokabeuten@hotmail.com) (J.B)

<sup>4</sup> Hospital General Zacatecas "Luz González Cosío", Servicios de Salud de Zacatecas, 98160, Zacatecas, México; [sammelisg@gmail.com](mailto:sammelisg@gmail.com) (S.E.S.G); [hormonitazac@gmail.com](mailto:hormonitazac@gmail.com) (E.C.V).

<sup>5</sup> Hematology Service, Hospital Universitario "Dr. José Eleuterio González", Universidad Autónoma de Nuevo León, Monterrey, 64460, Mexico; [dr\\_lauravillarreal@hotmail.com](mailto:dr_lauravillarreal@hotmail.com) (L.V.M)

<sup>6</sup> Department of Molecular Medicine, School of Medicine, University of Colima, Colima, 28040, México; [ivan\\_delgado\\_enciso@uclm.mx](mailto:ivan_delgado_enciso@uclm.mx) (I.D.E)

<sup>7</sup> Molecular and Structural Physiology Laboratory, School of Biological Sciences, Autonomous University of Nuevo León, Monterrey, Nuevo León, 64460, México; [iram.rodriguezsa@uanl.edu.mx](mailto:iram.rodriguezsa@uanl.edu.mx) (I.P.R.S)

<sup>8</sup> Department of Histology. Universidad Autónoma de Nuevo León. Facultad de Medicina, 64460, Mexico; [yikromero@email.com](mailto:yikromero@email.com) (V.R.D)

\*Correspondence: [margaritamf@uaz.edu.mx](mailto:margaritamf@uaz.edu.mx); Tel.: +52 (492) 9256690 Ext/Fax: 4511 (M.L.M.F)

**Supplementary Table S1 - UPLC-ESI-MS/MS analysis of plasma from Child with MD, his parents and healthy children control**

| Order | Protein ID | Proband: Father ratio |      | Proband: Mother ratio |      | Proband: Control ratio |      |
|-------|------------|-----------------------|------|-----------------------|------|------------------------|------|
| 1     | P26038     | *                     | DOWN | *                     | DOWN | *                      | DOWN |
| 2     | P01861     | *                     | DOWN | *                     | DOWN | *                      | DOWN |
| 3     | P0DOX3     | *                     | DOWN | *                     | DOWN | *                      | DOWN |
| 4     | P0DOX2     | *                     | DOWN | *                     | DOWN | *                      | DOWN |
| 5     | P30041     | *                     | DOWN | *                     | DOWN | *                      | DOWN |
| 6     | Q9BQE3     | *                     | DOWN | *                     | DOWN | *                      | DOWN |
| 7     | P19105     | *                     | DOWN | *                     | DOWN | *                      | DOWN |
| 8     | P35579     | *                     | DOWN | *                     | DOWN | *                      | DOWN |
| 9     | P68366     | *                     | DOWN | *                     | DOWN | *                      | DOWN |
| 10    | P00491     | *                     | DOWN | *                     | DOWN | *                      | DOWN |
| 11    | P06753     | *                     | DOWN | *                     | DOWN | *                      | DOWN |
| 12    | P61224     | *                     | DOWN | *                     | DOWN | *                      | DOWN |
| 13    | O15143     | *                     | DOWN | *                     | DOWN | *                      | DOWN |
| 14    | Q13418     | *                     | DOWN | *                     | DOWN | *                      | DOWN |
| 15    | O75083     | *                     | DOWN | *                     | DOWN | *                      | DOWN |
| 16    | O95810     | *                     | DOWN | *                     | DOWN | *                      | DOWN |
| 17    | P05106     | *                     | DOWN | *                     | DOWN | *                      | DOWN |
| 18    | P08567     | *                     | DOWN | *                     | DOWN | *                      | DOWN |
| 19    | P09493     | *                     | DOWN | *                     | DOWN | *                      | DOWN |
| 20    | P0DMV9     | *                     | DOWN | *                     | DOWN | *                      | DOWN |
| 21    | P27797     | *                     | DOWN | *                     | DOWN | *                      | DOWN |
| 22    | P30101     | *                     | DOWN | *                     | DOWN | *                      | DOWN |
| 23    | Q06187     | *                     | DOWN | *                     | DOWN | *                      | DOWN |
| 24    | P40197     | *                     | DOWN | *                     | DOWN | *                      | DOWN |
| 25    | P52566     | *                     | DOWN | *                     | DOWN | *                      | DOWN |
| 26    | Q01518     | *                     | DOWN | *                     | DOWN | *                      | DOWN |
| 27    | Q9ULV4     | *                     | DOWN | *                     | DOWN | *                      | DOWN |
| 28    | Q8NBL1     | *                     | DOWN | -                     | -    | *                      | DOWN |
| 29    | P00558     | -                     | -    | *                     | DOWN | *                      | DOWN |
| 30    | P07900     | -                     | -    | *                     | DOWN | *                      | DOWN |
| 31    | P0DJI9     | -                     | -    | *                     | DOWN | *                      | DOWN |
| 32    | P11142     | -                     | -    | *                     | DOWN | *                      | DOWN |
| 33    | P60174     | -                     | -    | *                     | DOWN | *                      | DOWN |
| 34    | P31146     | -                     | -    | *                     | DOWN | *                      | DOWN |
| 35    | Q99497     | -                     | -    | *                     | DOWN | *                      | DOWN |
| 36    | P06310     | -                     | -    | *                     | DOWN | *                      | DOWN |
| 37    | P60660     | -                     | -    | *                     | DOWN | *                      | DOWN |
| 38    | P07437     | -                     | -    | *                     | DOWN | *                      | DOWN |
| 39    | O00151     | -                     | -    | *                     | DOWN | *                      | DOWN |
| 40    | O00299     | -                     | -    | *                     | DOWN | *                      | DOWN |
| 41    | P01594     | -                     | -    | *                     | DOWN | *                      | DOWN |
| 42    | P01599     | -                     | -    | *                     | DOWN | *                      | DOWN |
| 43    | P04179     | -                     | -    | *                     | DOWN | *                      | DOWN |
| 44    | P04792     | -                     | -    | *                     | DOWN | *                      | DOWN |
| 45    | P07237     | -                     | -    | *                     | DOWN | *                      | DOWN |
| 46    | P48059     | -                     | -    | *                     | DOWN | *                      | DOWN |
| 47    | P50552     | -                     | -    | *                     | DOWN | *                      | DOWN |
| 48    | P52565     | -                     | -    | *                     | DOWN | *                      | DOWN |
| 49    | P55209     | -                     | -    | *                     | DOWN | *                      | DOWN |
| 50    | P61158     | -                     | -    | *                     | DOWN | *                      | DOWN |
| 51    | P61160     | -                     | -    | *                     | DOWN | *                      | DOWN |
| 52    | P61981     | -                     | -    | *                     | DOWN | *                      | DOWN |
| 53    | Q04917     | -                     | -    | *                     | DOWN | *                      | DOWN |
| 54    | Q05682     | -                     | -    | *                     | DOWN | *                      | DOWN |

|     |            |       |      |       |      |       |      |
|-----|------------|-------|------|-------|------|-------|------|
| 55  | Q15942     | -     | -    | *     | DOWN | *     | DOWN |
| 56  | Q3ZCW2     | -     | -    | *     | DOWN | *     | DOWN |
| 57  | Q9H4B7     | -     | -    | *     | DOWN | *     | DOWN |
| 58  | Q9HBI1     | -     | -    | *     | DOWN | *     | DOWN |
| 59  | P02533     | -     | -    | -     | -    | *     | DOWN |
| 60  | P02741     | -     | -    | -     | -    | *     | DOWN |
| 61  | A0A075B6K4 | -     | -    | -     | -    | *     | DOWN |
| 62  | P01706     | -     | -    | -     | -    | *     | DOWN |
| 63  | P12814     | 0.023 | DOWN | 0.001 | DOWN | 0.012 | DOWN |
| 64  | P01859     | 0.022 | DOWN | 0.117 | DOWN | 0.015 | DOWN |
| 65  | P63104     | 0.021 | DOWN | 0.005 | DOWN | 0.019 | DOWN |
| 66  | P0DJJ8     | **    | UP   | 0.633 | [OT] | 0.021 | DOWN |
| 67  | P21333     | 0.242 | DOWN | 0.005 | DOWN | 0.022 | DOWN |
| 68  | Q15404     | 0.020 | DOWN | 0.003 | DOWN | 0.024 | DOWN |
| 69  | P08514     | 0.033 | DOWN | 0.004 | DOWN | 0.025 | DOWN |
| 70  | Q86UX7     | 0.012 | DOWN | 0.004 | DOWN | 0.026 | DOWN |
| 71  | P01860     | 0.041 | DOWN | 0.130 | DOWN | 0.028 | DOWN |
| 72  | P67936     | 0.033 | DOWN | 0.009 | DOWN | 0.034 | DOWN |
| 73  | Q9Y490     | 0.238 | DOWN | 0.005 | DOWN | 0.035 | DOWN |
| 74  | P01876     | 0.092 | DOWN | 0.285 | DOWN | 0.044 | DOWN |
| 75  | P0DOX5     | 0.057 | DOWN | 0.508 | [OT] | 0.045 | DOWN |
| 76  | P0DP25     | 0.027 | DOWN | 0.022 | DOWN | 0.056 | DOWN |
| 77  | P23528     | 0.055 | DOWN | 0.013 | DOWN | 0.062 | DOWN |
| 78  | P18206     | 0.102 | DOWN | 0.008 | DOWN | 0.064 | DOWN |
| 79  | Q9C0B1     | 0.043 | DOWN | **    | UP   | 0.068 | DOWN |
| 80  | P01834     | 0.079 | DOWN | 0.200 | DOWN | 0.079 | DOWN |
| 81  | P62328     | 0.041 | DOWN | 0.091 | DOWN | 0.082 | DOWN |
| 82  | P37802     | 0.055 | DOWN | 0.014 | DOWN | 0.090 | DOWN |
| 83  | P60709     | 0.134 | DOWN | 0.014 | DOWN | 0.091 | DOWN |
| 84  | P30453     | **    | UP   | 0.024 | DOWN | 0.093 | DOWN |
| 85  | P01624     | 0.273 | DOWN | 0.296 | DOWN | 0.129 | DOWN |
| 86  | P0DOX8     | 0.121 | DOWN | 0.345 | DOWN | 0.130 | DOWN |
| 87  | P07737     | 0.123 | DOWN | 0.020 | DOWN | 0.137 | DOWN |
| 88  | P17936     | 0.237 | DOWN | 0.628 | [OT] | 0.149 | DOWN |
| 89  | P00450     | 0.109 | DOWN | 0.152 | DOWN | 0.155 | DOWN |
| 90  | A0A0A0MRZ8 | 0.408 | DOWN | 0.465 | DOWN | 0.155 | DOWN |
| 91  | P0DOY3     | 0.128 | DOWN | 0.347 | DOWN | 0.155 | DOWN |
| 92  | A0A0A0MS15 | 0.333 | DOWN | 0.462 | DOWN | 0.158 | DOWN |
| 93  | P01717     | 0.221 | DOWN | **    | UP   | 0.158 | DOWN |
| 94  | P21926     | 0.116 | DOWN | 0.021 | DOWN | 0.186 | DOWN |
| 95  | A0A075B6P5 | **    | UP   | 0.341 | DOWN | 0.215 | DOWN |
| 96  | P00488     | 0.173 | DOWN | 0.030 | DOWN | 0.221 | DOWN |
| 97  | P14618     | 0.304 | DOWN | 0.033 | DOWN | 0.227 | DOWN |
| 98  | P62937     | 0.341 | DOWN | 0.038 | DOWN | 0.249 | DOWN |
| 99  | P11226     | 0.772 | [OT] | 0.499 | DOWN | 0.255 | DOWN |
| 100 | P01619     | 0.477 | DOWN | 0.644 | [OT] | 0.255 | DOWN |
| 101 | P80748     | **    | UP   | **    | UP   | 0.269 | DOWN |
| 102 | P01591     | 0.516 | [OT] | 0.191 | DOWN | 0.299 | DOWN |
| 103 | P01701     | 3.072 | UP   | 3.584 | UP   | 0.315 | DOWN |
| 104 | A0A0C4DH68 | **    | UP   | 0.417 | DOWN | 0.325 | DOWN |
| 105 | P20742     | **    | UP   | 0.052 | DOWN | 0.341 | DOWN |
| 106 | P07195     | 1.639 | [OT] | 0.040 | DOWN | 0.362 | DOWN |
| 107 | P06312     | 0.236 | DOWN | 0.538 | [OT] | 0.376 | DOWN |
| 108 | P04406     | 0.195 | DOWN | 0.039 | DOWN | 0.388 | DOWN |
| 109 | P01700     | 1.377 | [OT] | 1.736 | [OT] | 0.406 | DOWN |
| 110 | P11021     | 1.149 | [OT] | 0.045 | DOWN | 0.418 | DOWN |
| 111 | P35908     | **    | UP   | **    | UP   | 0.420 | DOWN |
| 112 | P06331     | 0.233 | DOWN | 1.593 | [OT] | 0.426 | DOWN |

|     |            |        |      |        |      |       |      |
|-----|------------|--------|------|--------|------|-------|------|
| 113 | P13645     | 7.220  | UP   | 0.514  | [OT] | 0.436 | DOWN |
| 114 | P01703     | **     | UP   | 2.455  | UP   | 0.445 | DOWN |
| 115 | P02748     | 0.663  | [OT] | 0.431  | DOWN | 0.445 | DOWN |
| 116 | P35858     | 0.253  | DOWN | 0.236  | DOWN | 0.460 | DOWN |
| 117 | P06702     | **     | UP   | **     | UP   | 0.471 | DOWN |
| 118 | P04075     | 0.416  | DOWN | 0.038  | DOWN | 0.475 | DOWN |
| 119 | P02671     | 2.061  | UP   | 0.152  | DOWN | 0.519 | [OT] |
| 120 | O43866     | 1.142  | [OT] | 0.224  | DOWN | 0.541 | [OT] |
| 121 | O14791     | 0.315  | DOWN | 0.347  | DOWN | 0.546 | [OT] |
| 122 | P02750     | 2.478  | UP   | 0.692  | [OT] | 0.600 | [OT] |
| 123 | P01871     | 1.073  | [OT] | 0.257  | DOWN | 0.615 | [OT] |
| 124 | P04264     | 3.929  | UP   | 0.190  | DOWN | 0.659 | [OT] |
| 125 | P01780     | 0.481  | DOWN | 0.635  | [OT] | 0.671 | [OT] |
| 126 | P02675     | 2.087  | UP   | 0.225  | DOWN | 0.693 | [OT] |
| 127 | P02768     | 0.738  | [OT] | 12.696 | UP   | 0.711 | [OT] |
| 128 | P08571     | 0.543  | [OT] | 0.433  | DOWN | 0.725 | [OT] |
| 129 | P02743     | 0.289  | DOWN | 0.521  | [OT] | 0.731 | [OT] |
| 130 | A0A0B4J1X5 | 0.799  | [OT] | 0.483  | DOWN | 0.746 | [OT] |
| 131 | P18428     | 0.714  | [OT] | **     | UP   | 0.756 | [OT] |
| 132 | P01009     | 0.821  | [OT] | 0.644  | [OT] | 0.768 | [OT] |
| 133 | P02679     | 1.967  | [OT] | 0.228  | DOWN | 0.775 | [OT] |
| 134 | P02652     | 0.783  | [OT] | 0.991  | [OT] | 0.798 | [OT] |
| 135 | P05090     | 0.385  | DOWN | 0.925  | [OT] | 0.803 | [OT] |
| 136 | Q13201     | 0.790  | [OT] | 0.511  | [OT] | 0.806 | [OT] |
| 137 | P02749     | 1.315  | [OT] | 1.314  | [OT] | 0.812 | [OT] |
| 138 | P07358     | 1.079  | [OT] | 0.785  | [OT] | 0.834 | [OT] |
| 139 | P07357     | 1.119  | [OT] | 0.849  | [OT] | 0.848 | [OT] |
| 140 | P00740     | 0.735  | [OT] | 0.607  | [OT] | 0.853 | [OT] |
| 141 | Q13790     | 2.230  | UP   | 0.563  | [OT] | 0.854 | [OT] |
| 142 | P04004     | 0.800  | [OT] | 0.969  | [OT] | 0.858 | [OT] |
| 143 | Q14624     | 1.059  | [OT] | 0.735  | [OT] | 0.870 | [OT] |
| 144 | P02654     | 1.437  | [OT] | 1.222  | [OT] | 0.876 | [OT] |
| 145 | P19823     | 1.094  | [OT] | 0.607  | [OT] | 0.878 | [OT] |
| 146 | P00338     | 0.247  | DOWN | 0.046  | DOWN | 0.878 | [OT] |
| 147 | P14625     | 0.352  | DOWN | 0.131  | DOWN | 0.888 | [OT] |
| 148 | A0A0B4J1V0 | **     | UP   | 4.299  | UP   | 0.893 | [OT] |
| 149 | Q06033     | 2.437  | UP   | 0.979  | [OT] | 0.895 | [OT] |
| 150 | P06727     | 0.903  | [OT] | 1.129  | [OT] | 0.896 | [OT] |
| 151 | P00751     | 1.127  | [OT] | 0.902  | [OT] | 0.918 | [OT] |
| 152 | P00742     | 0.535  | [OT] | 1.005  | [OT] | 0.928 | [OT] |
| 153 | P01011     | 0.986  | [OT] | 0.975  | [OT] | 0.939 | [OT] |
| 154 | O75636     | 0.530  | [OT] | 0.866  | [OT] | 0.943 | [OT] |
| 155 | P19652     | 0.730  | [OT] | 0.785  | [OT] | 0.958 | [OT] |
| 156 | P22352     | 0.433  | DOWN | 0.616  | [OT] | 0.967 | [OT] |
| 157 | P02763     | 0.821  | [OT] | 1.148  | [OT] | 0.981 | [OT] |
| 158 | P19827     | 0.997  | [OT] | 0.645  | [OT] | 0.983 | [OT] |
| 159 | P02647     | 0.790  | [OT] | 1.262  | [OT] | 0.995 | [OT] |
| 160 | P25311     | 0.820  | [OT] | 0.900  | [OT] | 0.997 | [OT] |
| 161 | P01024     | 0.832  | [OT] | 0.912  | [OT] | 0.999 | [OT] |
| 162 | P02656     | 0.970  | [OT] | 1.184  | [OT] | 1.001 | [OT] |
| 163 | P27918     | 11.214 | UP   | 0.953  | [OT] | 1.008 | [OT] |
| 164 | P02746     | 0.723  | [OT] | 0.703  | [OT] | 1.010 | [OT] |
| 165 | Q15848     | 1.535  | [OT] | 0.707  | [OT] | 1.013 | [OT] |
| 166 | P35527     | **     | UP   | 0.912  | [OT] | 1.027 | [OT] |
| 167 | P36955     | 0.928  | [OT] | 0.974  | [OT] | 1.028 | [OT] |
| 168 | P02042     | 0.502  | [OT] | 5.093  | UP   | 1.032 | [OT] |
| 169 | P05160     | 1.779  | [OT] | 0.260  | DOWN | 1.037 | [OT] |
| 170 | P02747     | 1.299  | [OT] | 0.603  | [OT] | 1.073 | [OT] |

|     |        |        |      |       |      |       |      |
|-----|--------|--------|------|-------|------|-------|------|
| 171 | P05543 | 1.357  | [OT] | 1.217 | [OT] | 1.078 | [OT] |
| 172 | P00747 | 1.343  | [OT] | 0.704 | [OT] | 1.081 | [OT] |
| 173 | Q12805 | 0.453  | DOWN | 0.357 | DOWN | 1.090 | [OT] |
| 174 | P06396 | 0.747  | [OT] | 0.530 | [OT] | 1.106 | [OT] |
| 175 | P09871 | 0.843  | [OT] | 0.754 | [OT] | 1.110 | [OT] |
| 176 | P04275 | 2.300  | UP   | 0.344 | DOWN | 1.112 | [OT] |
| 177 | P06733 | 1.473  | [OT] | 0.107 | DOWN | 1.119 | [OT] |
| 178 | P05156 | 1.288  | [OT] | 1.206 | [OT] | 1.172 | [OT] |
| 179 | P02760 | 1.502  | [OT] | 0.854 | [OT] | 1.175 | [OT] |
| 180 | O75882 | 1.569  | [OT] | 1.183 | [OT] | 1.192 | [OT] |
| 181 | Q9UK55 | 1.461  | [OT] | 1.039 | [OT] | 1.193 | [OT] |
| 182 | Q14520 | 2.746  | UP   | 0.829 | [OT] | 1.202 | [OT] |
| 183 | P02751 | 2.926  | UP   | 0.342 | DOWN | 1.215 | [OT] |
| 184 | P02649 | 1.078  | [OT] | 1.720 | [OT] | 1.234 | [OT] |
| 185 | P00915 | 0.530  | [OT] | 0.956 | [OT] | 1.250 | [OT] |
| 186 | P0C0L4 | 0.348  | DOWN | 1.663 | [OT] | 1.256 | [OT] |
| 187 | Q08380 | 13.423 | UP   | 0.936 | [OT] | 1.261 | [OT] |
| 188 | P04217 | 2.074  | UP   | 1.061 | [OT] | 1.269 | [OT] |
| 189 | P07360 | 1.477  | [OT] | 1.014 | [OT] | 1.298 | [OT] |
| 190 | Q9UGM5 | **     | UP   | 3.322 | UP   | 1.301 | [OT] |
| 191 | P00738 | 0.915  | [OT] | 0.511 | [OT] | 1.307 | [OT] |
| 192 | P01031 | 0.778  | [OT] | 1.086 | [OT] | 1.310 | [OT] |
| 193 | P02766 | 0.967  | [OT] | 0.991 | [OT] | 1.336 | [OT] |
| 194 | P48740 | 1.727  | [OT] | 1.837 | [OT] | 1.342 | [OT] |
| 195 | P01008 | 1.263  | [OT] | 1.260 | [OT] | 1.359 | [OT] |
| 196 | P10909 | 1.514  | [OT] | 1.016 | [OT] | 1.380 | [OT] |
| 197 | P08603 | 1.745  | [OT] | 1.216 | [OT] | 1.382 | [OT] |
| 198 | P02790 | 1.725  | [OT] | 1.129 | [OT] | 1.383 | [OT] |
| 199 | P43251 | 1.257  | [OT] | 1.080 | [OT] | 1.389 | [OT] |
| 200 | P01023 | 1.773  | [OT] | 1.388 | [OT] | 1.414 | [OT] |
| 201 | P49908 | 1.264  | [OT] | 1.452 | [OT] | 1.415 | [OT] |
| 202 | P22792 | 1.187  | [OT] | 1.051 | [OT] | 1.422 | [OT] |
| 203 | P02787 | 1.028  | [OT] | 1.194 | [OT] | 1.450 | [OT] |
| 204 | P09211 | **     | UP   | 0.285 | DOWN | 1.460 | [OT] |
| 205 | P61769 | 2.956  | UP   | 0.471 | DOWN | 1.468 | [OT] |
| 206 | P08697 | 1.739  | [OT] | 1.003 | [OT] | 1.477 | [OT] |
| 207 | Q92954 | 0.511  | [OT] | 1.188 | [OT] | 1.512 | UP   |
| 208 | P27169 | 0.971  | [OT] | 1.427 | [OT] | 1.535 | UP   |
| 209 | P07359 | 1.253  | [OT] | 0.621 | [OT] | 1.586 | UP   |
| 210 | P20851 | 3.685  | UP   | 1.031 | [OT] | 1.589 | UP   |
| 211 | P00734 | 2.476  | UP   | 1.117 | [OT] | 1.591 | UP   |
| 212 | P01042 | 1.368  | [OT] | 1.347 | [OT] | 1.609 | UP   |
| 213 | P05155 | 1.944  | [OT] | 1.556 | [OT] | 1.614 | UP   |
| 214 | P02774 | 1.569  | [OT] | 1.510 | [OT] | 1.622 | UP   |
| 215 | Q9NP78 | **     | UP   | 0.567 | [OT] | 1.622 | UP   |
| 216 | P04114 | 1.196  | [OT] | 1.382 | [OT] | 1.625 | UP   |
| 217 | P51884 | 4.767  | UP   | 1.995 | [OT] | 1.626 | UP   |
| 218 | P02775 | 1.405  | [OT] | 0.637 | [OT] | 1.627 | UP   |
| 219 | P08185 | 1.201  | [OT] | 1.042 | [OT] | 1.635 | UP   |
| 220 | P02765 | 1.789  | [OT] | 1.636 | [OT] | 1.643 | UP   |
| 221 | Q16610 | 3.366  | UP   | 0.718 | [OT] | 1.685 | UP   |
| 222 | P29622 | 0.779  | [OT] | 1.087 | [OT] | 1.689 | UP   |
| 223 | P00736 | 1.736  | [OT] | 1.154 | [OT] | 1.694 | UP   |
| 224 | P43652 | 1.817  | [OT] | 1.438 | [OT] | 1.694 | UP   |
| 225 | P04003 | 1.599  | [OT] | 1.550 | [OT] | 1.701 | UP   |
| 226 | P02745 | 1.487  | [OT] | 1.130 | [OT] | 1.715 | UP   |
| 227 | P02655 | 4.787  | UP   | 1.365 | [OT] | 1.721 | UP   |
| 228 | P22105 | **     | UP   | **    | UP   | 1.731 | UP   |

|     |        |        |      |        |      |        |    |
|-----|--------|--------|------|--------|------|--------|----|
| 229 | P00739 | 1.513  | [OT] | 1.032  | [OT] | 1.736  | UP |
| 230 | Q96IY4 | 1.584  | [OT] | 1.061  | [OT] | 1.741  | UP |
| 231 | P05546 | 1.408  | [OT] | 1.180  | [OT] | 1.755  | UP |
| 232 | P12259 | **     | UP   | 0.588  | [OT] | 1.757  | UP |
| 233 | P05452 | 1.103  | [OT] | 1.422  | [OT] | 1.757  | UP |
| 234 | O00391 | **     | UP   | 0.982  | [OT] | 1.776  | UP |
| 235 | P07225 | 1.414  | [OT] | 1.035  | [OT] | 1.780  | UP |
| 236 | P0C0L5 | 1.120  | [OT] | 1.271  | [OT] | 1.861  | UP |
| 237 | P13671 | 2.440  | UP   | 1.411  | [OT] | 1.910  | UP |
| 238 | P00748 | 3.268  | UP   | 1.309  | [OT] | 1.916  | UP |
| 239 | P23142 | 4.292  | UP   | 0.715  | [OT] | 1.921  | UP |
| 240 | P02753 | 0.806  | [OT] | 1.292  | [OT] | 1.968  | UP |
| 241 | P10643 | 4.020  | UP   | 1.915  | [OT] | 2.014  | UP |
| 242 | Q9NZP8 | 6.656  | UP   | 1.946  | [OT] | 2.048  | UP |
| 243 | Q04756 | 6.000  | UP   | 3.180  | UP   | 2.073  | UP |
| 244 | P05154 | 1.418  | [OT] | 1.412  | [OT] | 2.117  | UP |
| 245 | P03952 | 1.515  | [OT] | 1.104  | [OT] | 2.126  | UP |
| 246 | P35542 | 1.803  | [OT] | 1.317  | [OT] | 2.131  | UP |
| 247 | P00746 | 4.230  | UP   | 1.651  | [OT] | 2.143  | UP |
| 248 | O95445 | 1.778  | [OT] | 2.221  | UP   | 2.149  | UP |
| 249 | P01019 | 1.384  | [OT] | 2.183  | UP   | 2.155  | UP |
| 250 | P15169 | 4.694  | UP   | 1.625  | [OT] | 2.229  | UP |
| 251 | Q96PD5 | 4.361  | UP   | 1.430  | [OT] | 2.238  | UP |
| 252 | P55056 | 2.703  | UP   | 0.960  | [OT] | 2.276  | UP |
| 253 | Q6UXB8 | 3.233  | UP   | 2.512  | UP   | 2.376  | UP |
| 254 | P04070 | **     | UP   | 1.379  | [OT] | 2.394  | UP |
| 255 | P80108 | 1.225  | [OT] | 1.492  | [OT] | 2.414  | UP |
| 256 | P04196 | 1.792  | [OT] | 1.766  | [OT] | 2.491  | UP |
| 257 | P03951 | 1.293  | [OT] | 2.384  | UP   | 2.530  | UP |
| 258 | P06276 | 2.608  | UP   | 1.236  | [OT] | 2.578  | UP |
| 259 | P68871 | 2.327  | UP   | 3.990  | UP   | 2.619  | UP |
| 260 | P54108 | **     | UP   | 0.816  | [OT] | 2.865  | UP |
| 261 | P00918 | 1.859  | [OT] | 0.432  | DOWN | 2.947  | UP |
| 262 | P02776 | 2.494  | UP   | 0.676  | [OT] | 3.007  | UP |
| 263 | P26927 | 7.696  | UP   | 2.633  | UP   | 3.016  | UP |
| 264 | P05109 | 1.132  | [OT] | 13.757 | UP   | 3.047  | UP |
| 265 | P07996 | 5.342  | UP   | 1.322  | [OT] | 3.065  | UP |
| 266 | P00441 | **     | UP   | 0.321  | DOWN | 3.118  | UP |
| 267 | Q03591 | 2.841  | UP   | 1.477  | [OT] | 3.148  | UP |
| 268 | P04180 | 3.983  | UP   | 1.496  | [OT] | 3.421  | UP |
| 269 | P04278 | **     | UP   | 2.532  | UP   | 3.867  | UP |
| 270 | P04040 | 2.290  | UP   | 0.949  | [OT] | 4.107  | UP |
| 271 | P13473 | 2.597  | UP   | 5.707  | UP   | 4.372  | UP |
| 272 | Q6EMK4 | **     | UP   | 1.435  | [OT] | 4.840  | UP |
| 273 | O00187 | **     | UP   | 6.633  | UP   | 6.282  | UP |
| 274 | P13598 | **     | UP   | 0.906  | [OT] | 7.326  | UP |
| 275 | P22891 | **     | UP   | 1.782  | [OT] | 7.367  | UP |
| 276 | P14151 | 1.523  | [OT] | 1.124  | [OT] | 7.434  | UP |
| 277 | P32119 | 7.476  | UP   | 2.885  | UP   | 7.543  | UP |
| 278 | P61626 | **     | UP   | 1.995  | [OT] | 7.765  | UP |
| 279 | P69892 | 5.582  | UP   | 15.346 | UP   | 12.279 | UP |
| 280 | Q13103 | 10.618 | UP   | 1.141  | [OT] | 12.663 | UP |
| 281 | P55072 | -      | -    | *      | DOWN | -      | -  |
| 282 | P07384 | -      | -    | *      | DOWN | -      | -  |
| 283 | P0CG39 | -      | -    | *      | DOWN | -      | -  |
| 284 | P14543 | -      | -    | *      | DOWN | -      | -  |
| 285 | P16109 | -      | -    | *      | DOWN | -      | -  |
| 286 | P50395 | -      | -    | *      | DOWN | -      | -  |

|     |        |    |    |         |      |    |    |
|-----|--------|----|----|---------|------|----|----|
| 287 | Q14247 | -  | -  | *       | DOWN | -  | -  |
| 288 | Q15084 | -  | -  | *       | DOWN | -  | -  |
| 289 | Q9UBW5 | -  | -  | *       | DOWN | -  | -  |
| 290 | Q92496 | ** | UP | 1.437   | [OT] | ** | UP |
| 291 | Q15833 | ** | UP | 163.695 | UP   | ** | UP |

---

\*Non detected in proband

\*\*Non detected in the reference (father, mother or healthy children control)

[OT] = Outside the threshold

UP= Upregulated

DOWN =Downregulated

Supplementary Table S2. Result table of gene ontology analysis for downregulated proteins considering the cellular component as classifier.

| GO ID      | Term                                | P-value     | Uncorrected P-value | Number annotated | Annotated genes                                                                                                                                                                                                                                                                                                                          |
|------------|-------------------------------------|-------------|---------------------|------------------|------------------------------------------------------------------------------------------------------------------------------------------------------------------------------------------------------------------------------------------------------------------------------------------------------------------------------------------|
| GO-0070062 | extracellular exosome               | 7.12E-30    | 3.34E-32            | 45               | Aeth, ACTN1, ALDOA, ARHGDB, ARPC1B, CALR, CAP1, CD9, CF1, CP, FERMT3, FLNA, GAPDH, GP5, HSPA1B, IGFB, IGHA1, IGHA2, IGHD, IGHG2, IGHG3, IGHG4, IGKC, IGLL5, ITGA2B, ITGB3, Msa, MYH9, MYL12A, PDIA3, PFN1, PKM, PNP, PPIA, PRDX6, RAPIB, RSU1, TAGLN2, TLN1, TPMS3, TPMA, TUBA4A, VCL, WDR1, YWHAZ                                       |
| GO-1903561 | extracellular vesicle               | 1.10E-29    | 5.18E-32            | 45               | Aeth, ACTN1, ALDOA, ARHGDB, ARPC1B, CALR, CAP1, CD9, CF1, CP, FERMT3, FLNA, GAPDH, GP5, HSPA1B, IGFB, IGHA1, IGHA2, IGHD, IGHG2, IGHG3, IGHG4, IGKC, IGLL5, ITGA2B, ITGB3, Msa, MYH9, MYL12A, PDIA3, PFN1, PKM, PNP, PPIA, PRDX6, RAPIB, RSU1, TAGLN2, TLN1, TPMS3, TPMA, TUBA4A, VCL, WDR1, YWHAZ                                       |
| GO-0043230 | extracellular organelle             | 1.22E-29    | 5.74E-32            | 45               | Aeth, ACTN1, ALDOA, ARHGDB, ARPC1B, CALR, CAP1, CD9, CF1, CP, FERMT3, FLNA, GAPDH, GP5, HSPA1B, IGFB, IGHA1, IGHA2, IGHD, IGHG2, IGHG3, IGHG4, IGKC, IGLL5, ITGA2B, ITGB3, Msa, MYH9, MYL12A, PDIA3, PFN1, PKM, PNP, PPIA, PRDX6, RAPIB, RSU1, TAGLN2, TLN1, TPMS3, TPMA, TUBA4A, VCL, WDR1, YWHAZ                                       |
| GO-0005615 | extracellular space                 | 3.03E-26    | 1.42E-28            | 49               | Aeth, ACTN1, ALDOA, ARHGDB, ARPC1B, CALR, CAP1, CD9, CF1, CP, F31A1, FERMT3, FLNA, GAPDH, GP5, HSPA1B, IGFB, IGHA1, IGHA2, IGHD, IGHG2, IGHG3, IGHG4, IGHV3-49, IGKC, IGKV3D-11, IGKV3D-7, IGLL5, ITGA2B, ITGB3, Msa, MYH9, MYL12A, PDIA3, PFN1, PKM, PNP, PPIA, PRDX6, RAPIB, RSU1, TAGLN2, TLN1, TPMS3, TPMA, TUBA4A, VCL, WDR1, YWHAZ |
| GO-0044421 | extracellular region part           | 5.56E-25    | 2.61E-27            | 49               | Aeth, ACTN1, ALDOA, ARHGDB, ARPC1B, CALR, CAP1, CD9, CF1, CP, F31A1, FERMT3, FLNA, GAPDH, GP5, HSPA1B, IGFB, IGHA1, IGHA2, IGHD, IGHG2, IGHG3, IGHG4, IGHV3-49, IGKC, IGKV3D-11, IGKV3D-7, IGLL5, ITGA2B, ITGB3, Msa, MYH9, MYL12A, PDIA3, PFN1, PKM, PNP, PPIA, PRDX6, RAPIB, RSU1, TAGLN2, TLN1, TPMS3, TPMA, TUBA4A, VCL, WDR1, YWHAZ |
| GO-0031982 | vesicle                             | 1.71E-24    | 8.03E-27            | 50               | Aeth, ACTN1, ALDOA, ARHGDB, ARPC1B, BTK, CALR, CAP1, CD9, CF1, CORO1C, CP, F31A1, FERMT3, FLNA, GAPDH, GP5, HSPA1B, IGFB, IGHA1, IGHA2, IGHD, IGHG2, IGHG3, IGHG4, IGKC, IGLL5, ITGA2B, ITGB3, Msa, MYH9, MYL12A, PDIA3, PFN1, PKM, PNP, PPIA, PRDX6, RAPIB, RSU1, TAGLN2, TLN1, TPMS3, TPMA, TUBA4A, VCL, WDR1, YWHAZ                   |
| GO-0005576 | extracellular region                | 2.97E-23    | 1.40E-25            | 51               | Aeth, ACTN1, ALDOA, ARHGDB, ARPC1B, CALR, CAP1, CD9, CF1, CP, F31A1, FERMT3, FLNA, GAPDH, GP5, HSPA1B, IGFB, IGHA1, IGHA2, IGHD, IGHG2, IGHG3, IGHG4, IGHV3-49, IGKC, IGKV3D-11, IGKV3D-7, IGLL5, ITGA2B, ITGB3, Msa, MYH9, MYL12A, PDIA3, PFN1, PKM, PNP, PPIA, PRDX6, RAPIB, RSU1, TAGLN2, TLN1, TPMS3, TPMA, TUBA4A, VCL, WDR1, YWHAZ |
| GO-0005925 | focal adhesion                      | 1.60E-21    | 7.52E-24            | 23               | Aeth, ACTN1, ARPC1B, CALR, CAP1, CD9, CF1, CORO1C, FLNA, HSPA1B, ILK, ITGA2B, ITGB3, Msa, MYH9, PDIA3, PFN1, PPIA, RSU1, TLN1, TPMS3, TPMA, VCL, YWHAZ                                                                                                                                                                                   |
| GO-0005924 | cell-substrate adherens junction    | 1.90E-21    | 8.90E-24            | 23               | Aeth, ACTN1, ARPC1B, CALR, CAP1, CD9, CF1, CORO1C, FLNA, HSPA1B, ILK, ITGA2B, ITGB3, Msa, MYH9, PDIA3, PFN1, PPIA, RSU1, TLN1, TPMS3, TPMA, VCL, YWHAZ                                                                                                                                                                                   |
| GO-0030055 | cell-substrate junction             | 1.11E-21    | 1.11E-23            | 23               | Aeth, ACTN1, ARPC1B, CALR, CAP1, CD9, CF1, CORO1C, FLNA, HSPA1B, ILK, ITGA2B, ITGB3, Msa, MYH9, PDIA3, PFN1, PPIA, RSU1, TLN1, TPMS3, TPMA, VCL, YWHAZ                                                                                                                                                                                   |
| GO-0005912 | adherens junction                   | 1.25E-18    | 5.85E-21            | 23               | Aeth, ACTN1, ARPC1B, CALR, CAP1, CD9, CF1, CORO1C, FLNA, HSPA1B, ILK, ITGA2B, ITGB3, Msa, MYH9, PDIA3, PFN1, PPIA, RSU1, TLN1, TPMS3, TPMA, VCL, YWHAZ                                                                                                                                                                                   |
| GO-0070161 | anchoring junction                  | 2.38E-18    | 1.12E-20            | 23               | Aeth, ACTN1, ARPC1B, CALR, CAP1, CD9, CF1, CORO1C, FLNA, HSPA1B, ILK, ITGA2B, ITGB3, Msa, MYH9, PDIA3, PFN1, PPIA, RSU1, TLN1, TPMS3, TPMA, VCL, YWHAZ                                                                                                                                                                                   |
| GO-0072562 | blood microparticle                 | 2.54E-17    | 1.19E-19            | 15               | Aeth, CP, F31A1, HSPA1B, IGHA1, IGHA2, IGHD, IGHG2, IGHG3, IGHG4, IGKC, ITGA2B, Msa, PFN1, YWHAZ                                                                                                                                                                                                                                         |
| GO-0030054 | cell junction                       | 4.55E-13    | 2.13E-15            | 26               | Aeth, ACTN1, ARPC1B, CALR, CAP1, CD9, CF1, CORO1C, FERMT3, FLNA, HSPA1B, ILK, ITGA2B, ITGB3, Msa, MYH9, PDIA3, PFN1, PPIA, RAPIB, RSU1, TLN1, TPMS3, TPMA, VCL, WDR1, YWHAZ                                                                                                                                                              |
| GO-0015629 | actin cytoskeleton                  | 2.37E-11    | 1.11E-13            | 17               | Aeth, ACTN1, ALDOA, ARPC1B, CAP1, CF1, CORO1C, FERMT3, FLNA, ILK, MYH9, MYL12A, TPMS1, TPMS3, TPMS4, VCL, WDR1                                                                                                                                                                                                                           |
| GO-0019814 | immunoglobulin complex              | 1.60E-09    | 7.53E-12            | 9                | IGHA1, IGHA2, IGHD, IGHG2, IGHG3, IGHG4, IGHV3-49, IGKC, IGKV3D-7, IGLL5                                                                                                                                                                                                                                                                 |
| GO-0042571 | immunoglobulin complex, circulating | 1.92E-09    | 9.03E-12            | 9                | IGHA1, IGHA2, IGHD, IGHG2, IGHG3, IGHG4, IGHV3-49, IGKC, IGLL5                                                                                                                                                                                                                                                                           |
| GO-0005856 | cytoskeleton                        | 9.83E-09    | 4.62E-11            | 27               | Aeth, ACTN1, ALDOA, ARHGDB, ARPC1B, CAP1, CF1, CORO1C, FERMT3, FLNA, GAPDH, HSPA1B, ILK, Msa, MYH9, MYL12A, PFN1, PNP, TLN1, TMSB4X, TPMS1, TPMS3, TPMS4, TUBA4A, VCL, WDR1                                                                                                                                                              |
| GO-0030141 | secretory granule                   | 5.01E-08    | 2.35E-10            | 12               | ACTN1, ALDOA, CALR, CAP1, CD9, F31A1, FERMT3, HSPA1B, ITGA2B, ITGB3, PKM, PNP, PPIA, PRDX6, RAPIB, TMSB4X, VCL                                                                                                                                                                                                                           |
| GO-0060205 | cytoplasmic vesicle lumen           | 5.86E-08    | 2.75E-10            | 12               | ACTN1, ALDOA, CALR, CAP1, F31A1, FERMT3, PKM, PNP, PPIA, PRDX6, RAPIB, TMSB4X, VCL                                                                                                                                                                                                                                                       |
| GO-0031091 | platelet alpha granule              | 5.95E-08    | 2.79E-10            | 8                | ACTN1, ALDOA, CD9, F31A1, FERMT3, ITGA2B, ITGB3, TMSB4X                                                                                                                                                                                                                                                                                  |
| GO-0031983 | vesicle lumen                       | 6.06E-08    | 2.85E-10            | 12               | ACTN1, ALDOA, CALR, CAP1, F31A1, FERMT3, PKM, PNP, PPIA, PRDX6, TMSB4X, VCL                                                                                                                                                                                                                                                              |
| GO-0034774 | secretory granule lumen             | 5.27E-07    | 2.47E-09            | 11               | ACTN1, ALDOA, CAP1, F31A1, FERMT3, PKM, PNP, PPIA, PRDX6, TMSB4X, VCL                                                                                                                                                                                                                                                                    |
| GO-0009503 | secretory vesicle                   | 7.86E-07    | 3.09E-09            | 17               | ACTN1, ALDOA, CALR, CAP1, CD9, F31A1, FERMT3, HSPA1B, ITGA2B, ITGB3, PKM, PNP, PPIA, PRDX6, RAPIB, TMSB4X, VCL                                                                                                                                                                                                                           |
| GO-0042641 | actomyosin                          | 8.60E-07    | 4.04E-09            | 7                | ACTN1, ILK, MYH9, TPMS1, TPMS3, TPMS4, WDR1                                                                                                                                                                                                                                                                                              |
| GO-0008987 | external side of plasma membrane    | 8.85E-07    | 4.16E-09            | 12               | CALR, CD9, IGHA1, IGHA2, IGHD, IGHG2, IGHG3, IGHG4, IGHV3-49, IGKC, IGLL5, ITGA2B                                                                                                                                                                                                                                                        |
| GO-0009986 | cell surface                        | 2.15E-06    | 1.01E-08            | 16               | CALR, CD9, IGHA1, IGHA2, IGHD, IGHG2, IGHG3, IGHG4, IGHV3-49, IGKC, IGLL5, ITGA2B, ITGB3, Msa, MYH9, PDIA3, TLN1                                                                                                                                                                                                                         |
| GO-0044449 | contractile fiber part              | 3.97E-06    | 1.86E-08            | 9                | ACTN1, ALDOA, CORO1C, FLNA, ILK, TPMS1, TPMS3, TPMS4, VCL                                                                                                                                                                                                                                                                                |
| GO-0030016 | myofibril                           | 4.46E-06    | 2.09E-08            | 9                | ACTN1, ALDOA, CORO1C, FLNA, ILK, TPMS1, TPMS3, TPMS4, VCL                                                                                                                                                                                                                                                                                |
| GO-0043292 | contractile fiber                   | 6.75E-06    | 3.17E-08            | 9                | ACTN1, ALDOA, CORO1C, FLNA, ILK, TPMS1, TPMS3, TPMS4, VCL                                                                                                                                                                                                                                                                                |
| GO-0044433 | cytoplasmic vesicle part            | 9.85E-06    | 4.62E-08            | 19               | ACTN1, ALDOA, CALR, CAP1, CD9, CORO1C, F31A1, FERMT3, HSPA1B, ITGA2B, ITGB3, PDIA3, PKM, PNP, PPIA, PRDX6, RAPIB, TMSB4X, VCL                                                                                                                                                                                                            |
| GO-0001726 | ruffle                              | 1.12E-05    | 5.24E-08            | 8                | ACTN1, CF1, CORO1C, ITGB3, MYH9, PLEK, TLN1, TPMS1                                                                                                                                                                                                                                                                                       |
| GO-0001725 | stress fiber                        | 1.13E-05    | 5.30E-08            | 6                | ACTN1, ILK, MYH9, TPMS1, TPMS3, TPMS4                                                                                                                                                                                                                                                                                                    |
| GO-0097517 | contractile actin filament bundle   | 1.13E-05    | 5.30E-08            | 6                | ACTN1, ILK, MYH9, TPMS1, TPMS3, TPMS4                                                                                                                                                                                                                                                                                                    |
| GO-0005884 | actin filament                      | 1.55E-05    | 7.30E-08            | 7                | Aeth, ACTN1, FLNA, TPMS1, TPMS3, TPMS4, WDR1                                                                                                                                                                                                                                                                                             |
| GO-0012432 | actin filament bundle               | 2.04E-05    | 9.59E-08            | 6                | ACTN1, ILK, MYH9, TPMS1, TPMS3, TPMS4                                                                                                                                                                                                                                                                                                    |
| GO-0005862 | muscle thin filament tropomyosin    | 2.18E-05    | 1.02E-07            | 3                | TPMS1, TPMS3, TPMS4                                                                                                                                                                                                                                                                                                                      |
| GO-0030017 | sarcomere                           | 3.49E-05    | 1.64E-07            | 8                | ACTN1, ALDOA, CORO1C, FLNA, ILK, TPMS1, TPMS3, TPMS4                                                                                                                                                                                                                                                                                     |
| GO-0071944 | cell periphery                      | 3.72E-05    | 1.74E-07            | 37               | Aeth, ACTN1, BTK, CALR, CAP1, CD9, CF1, CORO1C, CP, FLNA, GAPDH, GP5, HSPA1B, IGHA1, IGHA2, IGHD, IGHG2, IGHG3, IGHG4, IGHV3-49, IGKC, IGKV3D-11, IGKV3D-7, IGLL5, ILK, ITGA2B, ITGB3, Msa, MYH9, PFN1, PLEK, RAPIB, SDPR, TLN1, TPMS1, VCL, WDR1                                                                                        |
| GO-0098552 | side of membrane                    | 5.77E-05    | 2.71E-07            | 12               | CALR, CD9, IGHA1, IGHA2, IGHD, IGHG2, IGHG3, IGHG4, IGHV3-49, IGKC, IGLL5, ITGA2B                                                                                                                                                                                                                                                        |
| GO-0005829 | cytosol                             | 6.95E-05    | 3.26E-07            | 34               | Aeth, ACTN1, ALDOA, ARHGDB, ARPC1B, BTK, CALR, CF1, FLNA, GAPDH, HSPA1B, ILK, Msa, MYH9, MYL12A, PFN1, PKM, PNP, PPIA, PRDX6, RAPIB, RSU1, SDPR, TAGLN2, TLN1, TMSB4X, TPMS1, TPMS3, TPMS4, TUBA4A, VCL, WDR1, YWHAZ                                                                                                                     |
| GO-0032587 | ruffle membrane                     | 7.91E-05    | 3.71E-07            | 2                | CF1, CORO1C, ITGB3, PLEK, TLN1, TPMS1                                                                                                                                                                                                                                                                                                    |
| GO-0005886 | plasma membrane                     | 8.09E-05    | 3.80E-07            | 36               | Aeth, ACTN1, BTK, CALR, CAP1, CD9, CF1, CORO1C, CP, FLNA, GAPDH, GP5, HSPA1B, IGHA1, IGHA2, IGHD, IGHG2, IGHG3, IGHG4, IGHV3-49, IGKC, IGKV3D-11, IGKV3D-7, IGLL5, ILK, ITGA2B, ITGB3, Msa, MYH9, PLEK, RAPIB, SDPR, TLN1, TPMS1, VCL, WDR1                                                                                              |
| GO-0031252 | cell leading edge                   | 8.68E-05    | 4.07E-07            | 10               | Aeth, ACTN1, CF1, CORO1C, ILK, ITGB3, MYH9, PLEK, TLN1, TPMS1                                                                                                                                                                                                                                                                            |
| GO-0031410 | cytoplasmic vesicle                 | 0.000128874 | 6.05E-07            | 22               | ACTN1, ALDOA, ARHGDB, BTK, CALR, CAP1, CD9, CORO1C, F31A1, FERMT3, HSPA1B, ITGA2B, ITGB3, PDIA3, PKM, PNP, PPIA, PRDX6, RAPIB, TMSB4X, VCL, YWHAZ                                                                                                                                                                                        |
| GO-0097708 | intracellular vesicle               | 0.000131714 | 6.18E-07            | 22               | ACTN1, ALDOA, ARHGDB, BTK, CALR, CAP1, CD9, CORO1C, F31A1, FERMT3, HSPA1B, ITGA2B, ITGB3, PDIA3, PKM, PNP, PPIA, PRDX6, RAPIB, TMSB4X, VCL, YWHAZ                                                                                                                                                                                        |
| GO-0030863 | cortical cytoskeleton               | 0.000288044 | 1.35E-06            | 6                | Aeth, CAP1, CF1, FLNA, MYH9, WDR1                                                                                                                                                                                                                                                                                                        |
| GO-0031093 | platelet alpha granule lumen        | 0.000363446 | 1.71E-06            | 5                | ACTN1, ALDOA, F31A1, FERMT3, TMSB4X                                                                                                                                                                                                                                                                                                      |
| GO-0044430 | cytoskeletal part                   | 0.000398276 | 1.87E-06            | 18               | Aeth, ACTN1, ARPC1B, CAP1, CF1, FERMT3, FLNA, HSPA1B, ILK, MYH9, MYL12A, TPMS1, TPMS3, TPMS4, TUBA1C, TUBA4A, VCL, WDR1                                                                                                                                                                                                                  |
| GO-1904813 | ficolin-1-rich granule lumen        | 0.000404662 | 1.90E-06            | 6                | ALDOA, HSPA1B, PKM, PNP, PPIA, VCL                                                                                                                                                                                                                                                                                                       |
| GO-0005911 | cell-cell junction                  | 0.000554672 | 2.60E-06            | 9                | Aeth, ACTN1, CF1, FLNA, ILK, ITGB3, RAPIB, VCL, WDR1                                                                                                                                                                                                                                                                                     |

Number of downregulated proteins equal to 59  
The result table shows 59 downregulated proteins, 4 genes unannotated: No-name, calmla, IGKV3D-11, and IGKV3D-7 ; 2 unknown: No-name and calmla.  
p-value ≤ 0.001

Supplementary Table S3 -Result table of gene ontology analysis for downregulated proteins considering the biological process as classifier.

| GO ID      | Term                              | P-value  | Uncorrected P-value | Number annotated | Annotated genes                                                                                                                                                                                                                                                                                                  |
|------------|-----------------------------------|----------|---------------------|------------------|------------------------------------------------------------------------------------------------------------------------------------------------------------------------------------------------------------------------------------------------------------------------------------------------------------------|
| GO-0016192 | vesicle-mediated transport        | 1.05E-19 | 9.40E-23            | 38               | Aeth, ACTN1, ALDOA, ARPC1B, BTK, CALR, CAP1, CD9, CORO1C, F31A1, FERMT3, FLNA, HSPA1B, IGHA1, IGHA2, IGHD, IGHG2, IGHG3, IGHG4, IGHV3-49, IGKC, IGLL5, ITGA2B, ITGB3, Msa, MYH9, PKM, PLEK, PNP, PPIA, PRDX6, RAPIB, TAGLN2, TLN1, TMSB4X, TUBA4A, VCL, WDR1                                                     |
| GO-0001775 | cell activation                   | 2.34E-19 | 2.08E-22            | 33               | Aeth, ALDOA, BTK, CAP1, CD9, FERMT3, FLNA, GP5, HSPA1B, IGHA1, IGHA2, IGHD, IGHG2, IGHG3, IGHG4, IGHV3-49, IGKC, IGLL5, ILK, ITGA2B, ITGB3, Msa, MYH9, MYL12A, PKM, PNP, PPIA, PRDX6, RAPIB, TLN1, VCL, YWHAZ                                                                                                    |
| GO-0002576 | platelet degranulation            | 2.38E-17 | 2.12E-20            | 12               | ACTN1, ALDOA, CD9, F31A1, FERMT3, FLNA, ITGA2B, ITGB3, PLEK, TAGLN2, TLN1, TMSB4X, TUBA4A, VCL, WDR1                                                                                                                                                                                                             |
| GO-0070527 | platelet aggregation              | 1.80E-16 | 1.61E-19            | 12               | Aeth, CD9, FERMT3, FLNA, ILK, ITGA2B, ITGB3, MYH9, MYL12A, PLEK, TLN1, VCL, YWHAZ                                                                                                                                                                                                                                |
| GO-0045055 | regulated exocytosis              | 1.57E-15 | 1.40E-18            | 24               | ACTN1, ALDOA, BTK, CAP1, CD9, F31A1, FERMT3, FLNA, HSPA1B, ITGA2B, ITGB3, MYH9, PKM, PLEK, PNP, PPIA, PRDX6, RAPIB, TAGLN2, TLN1, TMSB4X, TUBA4A, VCL, WDR1                                                                                                                                                      |
| GO-0034109 | homotypic cell-cell adhesion      | 1.48E-14 | 1.32E-17            | 12               | Aeth, CD9, FERMT3, FLNA, ILK, ITGA2B, ITGB3, MYH9, MYL12A, PLEK, TLN1, VCL, YWHAZ                                                                                                                                                                                                                                |
| GO-0003618 | platelet activation               | 1.58E-14 | 1.32E-17            | 14               | ACTN1, CD9, FERMT3, FLNA, GP5, ILK, ITGA2B, ITGB3, MYH9, MYL12A, PLEK, TLN1, VCL, YWHAZ                                                                                                                                                                                                                          |
| GO-0006887 | exocytosis                        | 3.03E-14 | 2.70E-17            | 24               | ACTN1, ALDOA, BTK, CAP1, CD9, F31A1, FERMT3, FLNA, HSPA1B, ITGA2B, ITGB3, MYH9, PKM, PLEK, PNP, PPIA, PRDX6, RAPIB, TAGLN2, TLN1, TMSB4X, TUBA4A, VCL, WDR1                                                                                                                                                      |
| GO-0030036 | actin cytoskeleton organization   | 4.94E-12 | 4.40E-15            | 20               | Aeth, ACTN1, ALDOA, ARHGDB, ARPC1B, CALR, CAP1, CF1, CORO1C, FLNA, ILK, MYH9, PFN1, PLEK, TLN1, TMSB4X, TPMS1, TPMS3, TPMS4, WDR1                                                                                                                                                                                |
| GO-0007596 | blood coagulation                 | 2.85E-11 | 2.54E-14            | 15               | Aeth, CD9, F31A1, FERMT3, FLNA, GP5, ILK, ITGA2B, ITGB3, MYH9, MYL12A, PLEK, TLN1, VCL, YWHAZ                                                                                                                                                                                                                    |
| GO-0050817 | coagulation                       | 3.41E-11 | 3.04E-14            | 15               | Aeth, CD9, F31A1, FERMT3, FLNA, GP5, ILK, ITGA2B, ITGB3, MYH9, MYL12A, PLEK, TLN1, VCL, YWHAZ                                                                                                                                                                                                                    |
| GO-0007010 | cytoskeleton organization         | 3.48E-11 | 3.10E-14            | 25               | Aeth, ACTN1, ALDOA, ARHGDB, ARPC1B, CALR, CAP1, CF1, CORO1C, FLNA, GAPDH, HSPA1B, ILK, Msa, MYH9, PFN1, PLEK, TLN1, TMSB4X, TPMS1, TPMS3, TPMS4, TUBA1C, TUBA4A, WDR1                                                                                                                                            |
| GO-0007599 | hemostasis                        | 3.57E-11 | 3.18E-14            | 15               | Aeth, CD9, F31A1, FERMT3, FLNA, GP5, ILK, ITGA2B, ITGB3, MYH9, MYL12A, PLEK, TLN1, VCL, YWHAZ                                                                                                                                                                                                                    |
| GO-0032940 | secretion by cell                 | 3.83E-11 | 3.42E-14            | 26               | ACTN1, ALDOA, BTK, CAP1, CD9, F31A1, FERMT3, FLNA, GAPDH, HSPA1B, IGHD, ITGA2B, ITGB3, MYH9, PKM, PLEK, PNP, PPIA, PRDX6, RAPIB, TAGLN2, TLN1, TMSB4X, TUBA4A, VCL, WDR1                                                                                                                                         |
| GO-0030029 | actin filament-based process      | 5.64E-11 | 5.03E-14            | 20               | Aeth, ACTN1, ALDOA, ARHGDB, ARPC1B, CALR, CAP1, CF1, CORO1C, FLNA, ILK, MYH9, PFN1, PLEK, TLN1, TMSB4X, TPMS1, TPMS3, TPMS4, WDR1                                                                                                                                                                                |
| GO-0002376 | immune system process             | 9.44E-11 | 8.41E-14            | 35               | ACTN1, ALDOA, ARPC1B, BTK, CALR, CAP1, CD9, FLNA, GAPDH, HSPA1B, IGHA1, IGHA2, IGHD, IGHG2, IGHG3, IGHG4, IGHV3-49, IGKC, IGKV3D-11, IGKV3D-7, IGLL5, ITGA2B, ITGB3, Msa, MYH9, PDIA3, PKM, PLEK, PNP, PPIA, PRDX6, RAPIB, VCL, WDR1                                                                             |
| GO-0008037 | cell recognition                  | 2.01E-10 | 1.79E-13            | 13               | ALDOA, CD9, IGHA1, IGHA2, IGHD, IGHG2, IGHG3, IGHG4, IGHV3-49, IGKC, IGLL5, MYH9                                                                                                                                                                                                                                 |
| GO-0046903 | secretion                         | 2.96E-10 | 2.64E-13            | 26               | ACTN1, ALDOA, BTK, CAP1, CD9, F31A1, FERMT3, FLNA, GAPDH, HSPA1B, IGHD, ITGA2B, ITGB3, MYH9, PKM, PLEK, PNP, PPIA, PRDX6, RAPIB, TAGLN2, TLN1, TMSB4X, TUBA4A, VCL, WDR1                                                                                                                                         |
| GO-0042060 | wound healing                     | 3.28E-10 | 2.92E-13            | 17               | Aeth, CD9, F31A1, FERMT3, FLNA, GP5, ILK, ITGA2B, ITGB3, MYH9, MYL12A, PKM, PLEK, TLN1, TPMS1, VCL, YWHAZ                                                                                                                                                                                                        |
| GO-0006909 | phagocytosis                      | 3.96E-10 | 3.53E-13            | 15               | Aeth, ARPC1B, CALR, CORO1C, IGHA1, IGHA2, IGHD, IGHG2, IGHG3, IGHG4, IGHV3-49, IGKC, IGLL5, ITGB3, MYH9                                                                                                                                                                                                          |
| GO-0002443 | leukocyte mediated immunity       | 8.66E-10 | 7.72E-13            | 12               | ALDOA, BTK, CAP1, HSPA1B, IGHA1, IGHA2, IGHD, IGHG2, IGHG3, IGHG4, IGHV3-49, IGKC, IGLL5, PKM, PNP, PPIA, PRDX6, RAPIB, VCL, WDR1                                                                                                                                                                                |
| GO-0002252 | immune effector process           | 9.64E-10 | 8.59E-13            | 23               | Aeth, ACTN1, ALDOA, ARHGDB, ARPC1B, BTK, CALR, CAP1, CD9, CF1, CORO1C, CP, F31A1, FERMT3, FLNA, GAPDH, HSPA1B, IGHA1, IGHA2, IGHD, IGHG2, IGHG3, IGHG4, IGHV3-49, IGKC, IGLL5, ILK, ITGA2B, ITGB3, Msa, MYH9, MYL12A, PKM, PLEK, PNP, PPIA, PRDX6, RAPIB, TAGLN2, TLN1, TMSB4X, TUBA1C, TUBA4A, VCL, WDR1, YWHAZ |
| GO-0051179 | localization                      | 1.11E-09 | 9.90E-13            | 47               | Aeth, ACTN1, ALDOA, ARHGDB, ARPC1B, BTK, CALR, CAP1, CD9, CF1, CORO1C, FLNA, ILK, MYH9, PFN1, PLEK, TLN1, TMSB4X, TPMS1, TUBA1C, TUBA4A, VCL, WDR1, YWHAZ                                                                                                                                                        |
| GO-0006810 | transport                         | 1.26E-09 | 1.13E-12            | 42               | Aeth, ACTN1, ALDOA, ARPC1B, BTK, CALR, CAP1, CD9, CORO1C, CP, F31A1, FERMT3, FLNA, GAPDH, HSPA1B, IGHA1, IGHA2, IGHD, IGHG2, IGHG3, IGHG4, IGHV3-49, IGKC, IGLL5, ITGA2B, ITGB3, Msa, MYH9, PKM, PLEK, PNP, PPIA, PRDX6, RAPIB, TAGLN2, TLN1, TMSB4X, TUBA1C, TUBA4A, VCL, WDR1, YWHAZ                           |
| GO-0051234 | establishment of localization     | 2.96E-09 | 2.64E-12            | 42               | Aeth, ACTN1, ALDOA, ARPC1B, BTK, CALR, CAP1, CD9, FLNA, GAPDH, HSPA1B, IGHA1, IGHA2, IGHD, IGHG2, IGHG3, IGHG4, IGHV3-49, IGKC, IGLL5, ITGA2B, ITGB3, Msa, MYH9, PDIA3, PKM, PLEK, PNP, PPIA, PRDX6, RAPIB, VCL, WDR1                                                                                            |
| GO-0009611 | response to wounding              | 6.01E-09 | 5.35E-12            | 17               | ACTN1, ALDOA, ARPC1B, BTK, CALR, CAP1, CD9, FLNA, GAPDH, HSPA1B, IGHA1, IGHA2, IGHD, IGHG2, IGHG3, IGHG4, IGHV3-49, IGKC, IGLL5, PKM, PNP, PPIA, PRDX6, RAPIB, VCL, WDR1                                                                                                                                         |
| GO-0050878 | regulation of body fluid levels   | 1.23E-08 | 1.10E-11            | 15               | Aeth, CD9, F31A1, FERMT3, FLNA, GP5, ILK, ITGA2B, ITGB3, MYH9, MYL12A, PLEK, TLN1, VCL, YWHAZ                                                                                                                                                                                                                    |
| GO-0006911 | phagocytosis, engulfment          | 1.35E-08 | 1.20E-11            | 10               | IGHA1, IGHA2, IGHD, IGHG2, IGHG3, IGHG4, IGHV3-49, IGKC, IGLL5, MYH9                                                                                                                                                                                                                                             |
| GO-0050853 | B cell receptor signaling pathway | 2.19E-08 | 1.95E-11            | 10               | BTK, IGHA1, IGHA2, IGHD, IGHG2, IGHG3, IGHG4, IGHV3-49, IGKC, IGLL5                                                                                                                                                                                                                                              |
| GO-0007015 | actin filament organization       | 2.24E-08 | 2.00E-11            | 14               | ACTN1, ALDOA, ARPC1B, CAP1, CF1, CORO1C, FLNA, PFN1, PLEK, TMSB4X, TPMS1, TPMS3, TPMS4, WDR1                                                                                                                                                                                                                     |
| GO-0009024 | plasma membrane invagination      | 2.50E-08 | 2.23E-11            | 10               | IGHA1, IGHA2, IGHD, IGHG2, IGHG3, IGHG4, IGHV3-49, IGKC, IGLL5, MYH9                                                                                                                                                                                                                                             |
| GO-0006910 | phagocytosis, recognition         | 3.04E-08 | 2.71E-11            | 9                | IGHA1, IGHA2, IGHD, IGHG2, IGHG3, IGHG4, IGHV3-49, IGKC, IGLL5                                                                                                                                                                                                                                                   |
| GO-0010324 | membrane invagination             | 4.20E-08 | 3.74E-11            | 10               | IGHA1, IGHA2, IGHD, IGHG2, IGHG3, IGHG4, IGHV3-49, IG                                                                                                                                                                                                                                                            |



|            |                                                                                                                           |             |          |    |                                                                                                                                                                                                                                                                                                                        |
|------------|---------------------------------------------------------------------------------------------------------------------------|-------------|----------|----|------------------------------------------------------------------------------------------------------------------------------------------------------------------------------------------------------------------------------------------------------------------------------------------------------------------------|
| GO:0097435 | supramolecular fiber organization                                                                                         | 1.35E-07    | 1.21E-10 | 16 | ACTN1, ALDOA, ARPC1B, CAP1, CFL1, CORO1C, FLNA, HSPA1B, ILK, PFN1, PLEK, TMSB4X, TPM1, TPM3, TPM4, WDR1                                                                                                                                                                                                                |
| GO:0051674 | localization of cell                                                                                                      | 1.48E-07    | 1.32E-10 | 23 | Aeth, ARHGDB, CALR, CAP1, CD9, CFL1, CORO1C, FERMT3, FLNA, IGHA1, IGH2, IGKC, ILK, ITGA2B, ITGB3, Msm, MYH9, PFN1, PPIA, TMSB4X, TPM1, VCL, WDR1                                                                                                                                                                       |
| GO:0048870 | cell motility                                                                                                             | 1.48E-07    | 1.32E-10 | 23 | Aeth, ARHGDB, CALR, CAP1, CD9, CFL1, CORO1C, FERMT3, FLNA, IGHA1, IGH2, IGKC, ILK, ITGA2B, ITGB3, Msm, MYH9, PFN1, PPIA, TMSB4X, TPM1, VCL, WDR1                                                                                                                                                                       |
| GO:0016477 | cell migration                                                                                                            | 1.48E-07    | 1.32E-10 | 22 | ARHGDB, CALR, CAP1, CD9, CFL1, CORO1C, FERMT3, FLNA, IGHA1, IGH2, IGKC, ILK, ITGA2B, ITGB3, Msm, MYH9, PFN1, PPIA, TMSB4X, TPM1, VCL, WDR1                                                                                                                                                                             |
| GO:0006897 | endocytosis                                                                                                               | 2.04E-07    | 1.82E-10 | 17 | Aeth, ARPC1B, CALR, CAP1, CD9, CORO1C, IGHA1, IGH2, IGHD, IGHG2, IGHG3, IGHG4, IGHV3-49, IGKC, IGLL5, ITGB3, MYH9                                                                                                                                                                                                      |
| GO:0016043 | cellular component organization                                                                                           | 2.92E-07    | 2.60E-10 | 43 | ACTN1, ALDOA, ARHGDB, ARPC1B, CALR, CAP1, CD9, CFL1, CORO1C, FERMT3, FLNA, GAPDH, HSPA1B, IGHA1, IGH2, IGHD, IGHG2, IGHG3, IGHG4, IGHV3-49, IGKC, IGLL5, ILK, ITGA2B, ITGB3, Msm, MYH9, PFN1, PPIA, TUBA1C, TUBA4A, VCL, WDR1, YWHAZ                                                                                   |
| GO:0007166 | cell surface receptor signaling pathway                                                                                   | 4.82E-07    | 4.30E-10 | 30 | Aeth, ARPC1B, BTK, CFL1, F3IA1, FERMT3, FLNA, HSPA1B, IGHA1, IGH2, IGHD, IGHG2, IGHG3, IGHG4, IGHV3-49, IGKC, IGLL5                                                                                                                                                                                                    |
| GO:0050864 | regulation of B cell activation                                                                                           | 7.23E-07    | 6.45E-10 | 10 | BTk, IGHA1, IGH2, IGHD, IGHG2, IGHG3, IGHG4, IGHV3-49, IGKC, IGLL5                                                                                                                                                                                                                                                     |
| GO:0071840 | cellular component organization or biogenesis                                                                             | 8.02E-07    | 7.15E-10 | 43 | Aeth, ACTN1, ALDOA, ARHGDB, ARPC1B, CALR, CAP1, CD9, CFL1, CORO1C, FERMT3, FLNA, GAPDH, HSPA1B, IGHA1, IGH2, IGHD, IGHG2, IGHG3, IGHG4, IGHV3-49, IGKC, IGLL5, ILK, ITGA2B, ITGB3, Msm, MYH9, PFN1, PLEK, PPIA, RAPIB, SDRP, TLN1, TMSB4X, TPM1, TPM3, TPM4, TUBA1C, TUBA4A, VCL, WDR1, YWHAZ                          |
| GO:0061024 | membrane organization                                                                                                     | 9.43E-07    | 8.41E-10 | 17 | Aeth, CALR, CD9, CORO1C, IGHA1, IGH2, IGHD, IGHG2, IGHG3, IGHG4, IGHV3-49, IGKC, IGLL5, MYH9, PPIA, SDRP, YWHAZ                                                                                                                                                                                                        |
| GO:0007229 | integrin-mediated signaling pathway                                                                                       | 1.07E-06    | 9.57E-10 | 8  | FERMT3, FLNA, ILK, ITGA2B, ITGB3, MYH9, PLEK, TLN1                                                                                                                                                                                                                                                                     |
| GO:0006958 | complement activation, classical pathway                                                                                  | 1.30E-06    | 1.16E-09 | 9  | IGHA1, IGH2, IGHD, IGHG2, IGHG3, IGHG4, IGHV3-49, IGKC, IGLL5                                                                                                                                                                                                                                                          |
| GO:0098657 | import into cell                                                                                                          | 1.69E-06    | 1.51E-09 | 17 | Aeth, ARPC1B, CALR, CAP1, CD9, CORO1C, IGHA1, IGH2, IGHD, IGHG2, IGHG3, IGHG4, IGHV3-49, IGKC, IGLL5, ITGB3, MYH9                                                                                                                                                                                                      |
| GO:0040011 | locomotion                                                                                                                | 1.89E-06    | 1.69E-09 | 23 | Aeth, ARHGDB, CALR, CAP1, CD9, CFL1, CORO1C, FERMT3, FLNA, IGHA1, IGH2, IGKC, ILK, ITGA2B, ITGB3, Msm, MYH9, PFN1, PPIA, TMSB4X, TPM1, VCL, WDR1                                                                                                                                                                       |
| GO:0002455 | humoral immune response mediated by circulating immunoglobulin                                                            | 2.59E-06    | 2.31E-09 | 9  | IGHA1, IGH2, IGHD, IGHG2, IGHG3, IGHG4, IGHV3-49, IGKC, IGLL5                                                                                                                                                                                                                                                          |
| GO:0016064 | immunoglobulin mediated immune response                                                                                   | 3.07E-06    | 2.74E-09 | 10 | BTk, IGHA1, IGH2, IGHD, IGHG2, IGHG3, IGHG4, IGHV3-49, IGKC, IGLL5                                                                                                                                                                                                                                                     |
| GO:0034329 | cell junction assembly                                                                                                    | 3.20E-06    | 2.85E-09 | 10 | Aeth, ACTN1, CD9, CORO1C, FLNA, ILK, RAPIB, TLN1, VCL, WDR1                                                                                                                                                                                                                                                            |
| GO:0019724 | B cell mediated immunity                                                                                                  | 3.46E-06    | 3.08E-09 | 10 | BTk, IGHA1, IGH2, IGHD, IGHG2, IGHG3, IGHG4, IGHV3-49, IGKC, IGLL5                                                                                                                                                                                                                                                     |
| GO:0050867 | positive regulation of cell activation                                                                                    | 3.58E-06    | 3.19E-09 | 12 | BTk, IGHA1, IGH2, IGHD, IGHG2, IGHG3, IGHG4, IGHV3-49, IGKC, IGLL5, PLEK, PNP                                                                                                                                                                                                                                          |
| GO:0006950 | response to stress                                                                                                        | 3.85E-06    | 3.43E-09 | 33 | Aeth, BTK, CALR, CD9, F3IA1, FERMT3, FLNA, GAPDH, GPS, HSPA1B, IGHA1, IGH2, IGHD, IGHG2, IGHG3, IGHG4, IGHV3-49, IGKC, IGLL5, ILK, ITGA2B, ITGB3, MYH9, MYL12A, PDIA3, PKM, PLEK, PRDX6, TLN1, TMSB4X, TPM1, VCL, YWHAZ                                                                                                |
| GO:0006956 | complement activation                                                                                                     | 7.04E-06    | 6.27E-09 | 9  | IGHA1, IGH2, IGHD, IGHG2, IGHG3, IGHG4, IGHV3-49, IGKC, IGLL5                                                                                                                                                                                                                                                          |
| GO:0051251 | positive regulation of lymphocyte activation                                                                              | 1.00E-05    | 8.91E-09 | 11 | BTk, IGHA1, IGH2, IGHD, IGHG2, IGHG3, IGHG4, IGHV3-49, IGKC, IGLL5, PNP                                                                                                                                                                                                                                                |
| GO:0006955 | immune response                                                                                                           | 1.74E-05    | 1.55E-08 | 24 | Aeth, ALDOA, ARPC1B, BTK, CAP1, CD9, CORO1C, IGHA1, IGH2, IGHD, IGHG2, IGHG3, IGHG4, IGHV3-49, IGKC, IGV3D-11, IGV3D-7, IGLL5, PKM, PNP, PPIA, PRDX6, RAPIB, VCL                                                                                                                                                       |
| GO:0034330 | cell junction organization                                                                                                | 1.93E-05    | 1.72E-08 | 10 | Aeth, ACTN1, CD9, CORO1C, FLNA, ILK, RAPIB, TLN1, VCL, WDR1                                                                                                                                                                                                                                                            |
| GO:0002429 | immune response-activating cell surface receptor signaling pathway                                                        | 2.31E-05    | 2.05E-08 | 12 | Aeth, ARPC1B, BTK, IGHA1, IGH2, IGHD, IGHG2, IGHG3, IGHG4, IGHV3-49, IGKC, IGLL5                                                                                                                                                                                                                                       |
| GO:0032970 | regulation of actin filament-based process                                                                                | 2.72E-05    | 2.42E-08 | 11 | ARHGDB, ARPC1B, CFL1, FLNA, ILK, MYH9, PFN1, PLEK, TMSB4X, TPM1, WDR1                                                                                                                                                                                                                                                  |
| GO:0002696 | positive regulation of leukocyte activation                                                                               | 3.09E-05    | 2.75E-08 | 11 | BTk, IGHA1, IGH2, IGHD, IGHG2, IGHG3, IGHG4, IGHV3-49, IGKC, IGLL5, PNP                                                                                                                                                                                                                                                |
| GO:0032989 | cellular component morphogenesis                                                                                          | 3.24E-05    | 2.89E-08 | 17 | Aeth, ACTN1, ALDOA, CALR, CAP1, CD9, CFL1, CORO1C, FERMT3, FLNA, ILK, ITGB3, Msm, MYH9, TPM1, VCL, WDR1                                                                                                                                                                                                                |
| GO:0050865 | regulation of cell activation                                                                                             | 4.22E-05    | 3.76E-08 | 13 | BTk, CD9, IGHA1, IGH2, IGHD, IGHG2, IGHG3, IGHG4, IGHV3-49, IGKC, IGLL5, PLEK, PNP                                                                                                                                                                                                                                     |
| GO:0002768 | immune response-regulating cell surface receptor signaling pathway                                                        | 4.70E-05    | 4.19E-08 | 12 | Aeth, ARPC1B, BTK, IGHA1, IGH2, IGHD, IGHG2, IGHG3, IGHG4, IGHV3-49, IGKC, IGLL5                                                                                                                                                                                                                                       |
| GO:0000902 | cell morphogenesis                                                                                                        | 5.62E-05    | 5.01E-08 | 16 | Aeth, ACTN1, ALDOA, CALR, CAP1, CFL1, CORO1C, FERMT3, FLNA, ILK, ITGB3, Msm, MYH9, TPM1, VCL, WDR1                                                                                                                                                                                                                     |
| GO:0042113 | B cell activation                                                                                                         | 6.01E-05    | 5.36E-08 | 10 | BTk, IGHA1, IGH2, IGHD, IGHG2, IGHG3, IGHG4, IGHV3-49, IGKC, IGLL5                                                                                                                                                                                                                                                     |
| GO:0002757 | immune response-activating signal transduction                                                                            | 6.17E-05    | 5.50E-08 | 13 | Aeth, ARPC1B, BTK, HSPA1B, IGHA1, IGH2, IGHD, IGHG2, IGHG3, IGHG4, IGHV3-49, IGKC, IGLL5                                                                                                                                                                                                                               |
| GO:0050851 | antigen receptor-mediated signaling pathway                                                                               | 6.18E-05    | 5.51E-08 | 10 | BTk, IGHA1, IGH2, IGHD, IGHG2, IGHG3, IGHG4, IGHV3-49, IGKC, IGLL5                                                                                                                                                                                                                                                     |
| GO:0031589 | cell-substrate adhesion                                                                                                   | 8.36E-05    | 7.45E-08 | 10 | ACTN1, CALR, CORO1C, FERMT3, FLNA, ILK, ITGA2B, ITGB3, RSU1, VCL                                                                                                                                                                                                                                                       |
| GO:0050896 | response to stimulus                                                                                                      | 8.94E-05    | 7.97E-08 | 48 | ACTN1, ALDOA, ARHGDB, ARPC1B, BTK, CALR, CAP1, CD9, CFL1, CORO1C, F3IA1, FERMT3, FLNA, GAPDH, GP5, HSPA1B, IGKALS, IGHA1, IGH2, IGHD, IGHG2, IGHG3, IGHG4, IGHV3-49, IGKC, IGV3D-11, IGV3D-7, IGLL5, ILK, ITGA2B, ITGB3, MYL12A, PDIA3, PFN1, PKM, PLEK, PNP, PPIA, PRDX6, RAPIB, RSU1, TLN1, TMSB4X, TPM1, VCL, YWHAZ |
| GO:0032956 | regulation of actin cytoskeleton organization                                                                             | 0.000108913 | 9.71E-08 | 10 | ARHGDB, ARPC1B, CFL1, FLNA, ILK, PFN1, PLEK, TMSB4X, TPM1, WDR1                                                                                                                                                                                                                                                        |
| GO:0002764 | immune response-regulating signaling pathway                                                                              | 0.000110963 | 9.89E-08 | 13 | Aeth, ARPC1B, BTK, HSPA1B, IGHA1, IGH2, IGHD, IGHG2, IGHG3, IGHG4, IGHV3-49, IGKC, IGLL5                                                                                                                                                                                                                               |
| GO:0006959 | humoral immune response                                                                                                   | 0.000151863 | 1.35E-07 | 10 | GAPDH, IGHA1, IGH2, IGHD, IGHG2, IGHG3, IGHG4, IGHV3-49, IGKC, IGLL5                                                                                                                                                                                                                                                   |
| GO:0098609 | cell-cell adhesion                                                                                                        | 0.000164914 | 1.47E-07 | 14 | Aeth, CD9, FERMT3, FLNA, ILK, ITGA2B, ITGB3, Msm, MYH9, MYL12A, PLEK, PNP, TLN1, VCL                                                                                                                                                                                                                                   |
| GO:0051270 | regulation of cellular component movement                                                                                 | 0.000201194 | 1.79E-07 | 15 | ACTN1, ARHGDB, CALR, CD9, CORO1C, FERMT3, FLNA, ILK, ITGA2B, ITGB3, Msm, PFN1, TMSB4X, TPM1, VCL                                                                                                                                                                                                                       |
| GO:0030334 | regulation of cell migration                                                                                              | 0.000201506 | 1.80E-07 | 14 | ARHGDB, CALR, CD9, CORO1C, FERMT3, FLNA, ILK, ITGA2B, ITGB3, Msm, PFN1, TMSB4X, TPM1, VCL                                                                                                                                                                                                                              |
| GO:0002449 | lymphocyte mediated immunity                                                                                              | 0.000219393 | 1.96E-07 | 10 | BTk, IGHA1, IGH2, IGHD, IGHG2, IGHG3, IGHG4, IGHV3-49, IGKC, IGLL5                                                                                                                                                                                                                                                     |
| GO:0002460 | adaptive immune response based on somatic recombination of immune receptors built from immunoglobulin superfamily domains | 0.000224713 | 2.00E-07 | 10 | BTk, IGHA1, IGH2, IGHD, IGHG2, IGHG3, IGHG4, IGHV3-49, IGKC, IGLL5                                                                                                                                                                                                                                                     |
| GO:0002253 | activation of immune response                                                                                             | 0.000240794 | 2.15E-07 | 13 | Aeth, ARPC1B, BTK, HSPA1B, IGHA1, IGH2, IGHD, IGHG2, IGHG3, IGHG4, IGHV3-49, IGKC, IGLL5                                                                                                                                                                                                                               |
| GO:1902905 | positive regulation of supramolecular fiber organization                                                                  | 0.000255738 | 2.28E-07 | 8  | ARPC1B, CFL1, FLNA, HSPA1B, PFN1, PLEK, TPM1, WDR1                                                                                                                                                                                                                                                                     |
| GO:0050900 | leukocyte migration                                                                                                       | 0.000266257 | 2.37E-07 | 11 | CALR, CD9, IGHA1, IGH2, IGHD, IGHG2, IGHG3, IGHG4, IGHV3-49, IGKC, IGLL5, Msm, MYH9, PPIA, WDR1                                                                                                                                                                                                                        |
| GO:0001667 | ameboid-type cell migration                                                                                               | 0.000271522 | 2.42E-07 | 10 | ARHGDB, CALR, CAP1, CFL1, CORO1C, ILK, ITGB3, MYH9, PFN1, TMSB4X                                                                                                                                                                                                                                                       |
| GO:0048518 | positive regulation of biological process                                                                                 | 0.000274261 | 2.44E-07 | 38 | Aeth, ACTN1, ARPC1B, BTK, CALR, CFL1, CORO1C, FERMT3, FLNA, GAPDH, HSPA1B, IGHA1, IGH2, IGHD, IGHG2, IGHG3, IGHG4, IGHV3-49, IGKC, IGLL5, ILK, ITGA2B, ITGB3, Msm, MYH9, PDIA3, PFN1, PKM, PLEK, PNP, PPIA, PRDX6, RAPIB, RSU1, TMSB4X, TPM1, WDR1, YWHAZ                                                              |
| GO:0046649 | positive regulation of lymphocyte activation                                                                              | 0.000322044 | 2.87E-07 | 13 | BTk, IGHA1, IGH2, IGHD, IGHG2, IGHG3, IGHG4, IGHV3-49, IGKC, IGLL5, Msm, MYH9, PNP                                                                                                                                                                                                                                     |
| GO:0051249 | regulation of lymphocyte activation                                                                                       | 0.000357368 | 3.19E-07 | 11 | BTk, IGHA1, IGH2, IGHD, IGHG2, IGHG3, IGHG4, IGHV3-49, IGKC, IGLL5, PNP                                                                                                                                                                                                                                                |
| GO:0007163 | establishment or maintenance of cell polarity                                                                             | 0.000375452 | 3.35E-07 | 8  | Aeth, CAP1, CFL1, ILK, Msm, MYH9, RAPIB, WDR1                                                                                                                                                                                                                                                                          |
| GO:0002684 | positive regulation of immune system process                                                                              | 0.000388774 | 3.47E-07 | 16 | Aeth, ARPC1B, BTK, CALR, HSPA1B, IGHA1, IGH2, IGHD, IGHG2, IGHG3, IGHG4, IGHV3-49, IGKC, IGLL5, ITGA2B, PNP                                                                                                                                                                                                            |
| GO:2000145 | regulation of cell motility                                                                                               | 0.000468498 | 4.18E-07 | 14 | ARHGDB, CALR, CD9, CORO1C, FERMT3, FLNA, ILK, ITGA2B, ITGB3, Msm, PFN1, TMSB4X, TPM1, VCL                                                                                                                                                                                                                              |
| GO:0048522 | positive regulation of cellular process                                                                                   | 0.000506915 | 4.52E-07 | 35 | ACTN1, ARPC1B, BTK, CALR, CFL1, CORO1C, FERMT3, FLNA, GAPDH, HSPA1B, IGHA1, IGH2, IGHD, IGHG2, IGHG3, IGHG4, IGHV3-49, IGKC, IGLL5, ILK, ITGA2B, ITGB3, Msm, MYH9, PDIA3, PFN1, PLEK, PNP, PPIA, PRDX6, RAPIB, TMSB4X, TPM1, WDR1, YWHAZ                                                                               |
| GO:0034446 | substrate adhesion-dependent cell spreading                                                                               | 0.000533577 | 4.76E-07 | 6  | CALR, CORO1C, FERMT3, FLNA, ILK, ITGB3                                                                                                                                                                                                                                                                                 |
| GO:0051495 | positive regulation of cytoskeleton organization                                                                          | 0.000540322 | 4.82E-07 | 8  | ARPC1B, CFL1, FLNA, HSPA1B, PFN1, PLEK, TPM1, WDR1                                                                                                                                                                                                                                                                     |
| GO:0002444 | myeloid leukocyte mediated immunity                                                                                       | 0.000697289 | 6.21E-07 | 11 | ALDOA, BTK, CAP1, HSPA1B, PKM, PNP, PPIA, PRDX6, RAPIB, VCL, WDR1                                                                                                                                                                                                                                                      |
| GO:0051493 | regulation of cytoskeleton organization                                                                                   | 0.000762116 | 6.79E-07 | 11 | ARHGDB, ARPC1B, CFL1, FLNA, HSPA1B, ILK, PFN1, PLEK, TMSB4X, TPM1, WDR1                                                                                                                                                                                                                                                |
| GO:0033622 | integrin activation                                                                                                       | 0.000830428 | 7.40E-07 | 4  | FERMT3, PLEK, RAPIB, TLN1                                                                                                                                                                                                                                                                                              |
| GO:0042742 | defense response to bacterium                                                                                             | 0.000896433 | 7.99E-07 | 9  | IGHA1, IGH2, IGHD, IGHG2, IGHG3, IGHG4, IGHV3-49, IGKC, IGLL5                                                                                                                                                                                                                                                          |

Number of downregulated proteins equal to 59  
The result table shows 59 downregulated proteins: 4 genes unannotated: No-name, calml1a, IGV3D-11, and IGV3D-7 ; 2 unknown: No-name and calml1a.  
p-value <= 0.001

**Supplementary Table S4 -Result table of gene ontology analysis for downregulated proteins considering the molecular function as classifier.**

| GO ID      | Term                                   | P-value  | Uncorrected P-value | Number annotated | Annotated genes                                                                                                                                                                                                                                                                                                                                                   |
|------------|----------------------------------------|----------|---------------------|------------------|-------------------------------------------------------------------------------------------------------------------------------------------------------------------------------------------------------------------------------------------------------------------------------------------------------------------------------------------------------------------|
| GO:0003779 | actin binding                          | 6.82E-13 | 5.78E-15            | 17               | ACTN1, ALDOA, ARPC1B, CAP1, CFL1, CORO1C, FLNA, Msm, MYH9, PFN1, TLN1, TMSB4X, TPM1, TPM3, TPM4, VCL, WDR1                                                                                                                                                                                                                                                        |
| GO:0050839 | cell adhesion molecule binding         | 6.08E-12 | 5.15E-14            | 17               | ACTN1, ALDOA, CALR, CD9, FERMT3, FLNA, ILK, ITGB3, Msm, MYH9, PFN1, PKM, PRDX6, TAGLN2, TLN1, VCL, YWHAZ                                                                                                                                                                                                                                                          |
| GO:0034987 | immunoglobulin receptor binding        | 3.55E-11 | 3.01E-13            | 10               | FLNA, IGHA1, IGH2, IGHD, IGHG2, IGHG3, IGHG4, IGHV3-49, IGKC, IGLL5                                                                                                                                                                                                                                                                                               |
| GO:0050115 | actin filament binding                 | 1.75E-09 | 1.49E-11            | 11               | ACTN1, ARPC1B, CFL1, CORO1C, FLNA, MYH9, TLN1, TPM1, TPM3, TPM4, WDR1                                                                                                                                                                                                                                                                                             |
| GO:0008092 | cytoskeletal protein binding           | 4.47E-09 | 3.79E-11            | 19               | Aeth, ACTN1, ARPC1B, CAP1, CFL1, CORO1C, FLNA, GAPDH, Msm, MYH9, PFN1, TLN1, TMSB4X, TPM1, TPM3, TPM4, VCL, WDR1                                                                                                                                                                                                                                                  |
| GO:0044877 | protein-containing complex binding     | 1.61E-08 | 1.36E-10            | 20               | Aeth, ACTN1, ARPC1B, CALR, CD9, CFL1, CORO1C, FERMT3, FLNA, ILK, ITGA2B, ITGB3, MYH9, PKM, RAPIB, TLN1, TPM1, TPM3, TPM4, WDR1                                                                                                                                                                                                                                    |
| GO:0003823 | antigen binding                        | 5.63E-07 | 4.77E-09            | 9                | IGHA1, IGH2, IGHD, IGHG2, IGHG3, IGHG4, IGHV3-49, IGKC, IGLL5                                                                                                                                                                                                                                                                                                     |
| GO:0005102 | signaling receptor binding             | 7.19E-07 | 6.09E-09            | 21               | ACTN1, CALR, CD9, CFL1, FERMT3, FLNA, HSPA1B, IGHA1, IGH2, IGHD, IGHG2, IGHG3, IGHG4, IGHV3-49, IGKC, IGLL5, ILK, ITGB3, Msm, MYH9, TLN1                                                                                                                                                                                                                          |
| GO:0005178 | integrin binding                       | 9.23E-07 | 7.82E-09            | 8                | ACTN1, CALR, CD9, FERMT3, ILK, ITGB3, MYH9, TLN1                                                                                                                                                                                                                                                                                                                  |
| GO:0005200 | structural constituent of cytoskeleton | 3.67E-06 | 3.11E-08            | 7                | Aeth, ARPC1B, Msm, TLN1, PPIA, TUBA4A                                                                                                                                                                                                                                                                                                                             |
| GO:0045296 | cadherin binding                       | 4.23E-06 | 3.59E-08            | 10               | ALDOA, FLNA, MYH9, PFN1, PKM, PRDX6, TAGLN2, TLN1, VCL, YWHAZ                                                                                                                                                                                                                                                                                                     |
| GO:0005515 | protein binding                        | 1.37E-05 | 1.16E-07            | 54               | Aeth, ACTN1, ALDOA, ARHGDB, ARPC1B, BTK, CALR, CAP1, CD9, CFL1, CORO1C, CP, FERMT3, FLNA, GAPDH, GP5, HSPA1B, IGKALS, IGHA1, IGH2, IGHD, IGHG2, IGHG3, IGHG4, IGHV3-49, IGKC, IGLL5, ILK, ITGA2B, ITGB3, Msm, MYH9, MYL12A, PDIA3, PFN1, PKM, PLEK, PNP, PPIA, PRDX6, RAPIB, RSU1, SDRP, TAGLN2, TLN1, TMSB4X, TPM1, TPM3, TPM4, TUBA1C, TUBA4A, VCL, WDR1, YWHAZ |

Number of downregulated proteins equal to 59  
The result table shows 59 downregulated proteins: 4 genes unannotated: No-name, calml1a, IGV3D-11, and IGV3D-7 ; 2 unknown: No-name and calml1a.  
p-value <= 0.001

**Supplementary Table S5 - Result table of gene ontology analysis for upregulated proteins considering the cellular component as classifier.**

| GO ID      | Term                      | P-value  | Uncorrected P-value | Number annotated | Annotated genes                                                      |
|------------|---------------------------|----------|---------------------|------------------|----------------------------------------------------------------------|
| GO:0005615 | extracellular space       | 1.83E-07 | 3.33E-09            | 11               | HBb, HBg2, HGFAC, LAMP2, MASP2, MST1, P116, PRDX2, SHBG, STXB2, TNXB |
| GO:0044421 | extracellular region part | 3.61E-07 | 6.56E-09            | 11               | HBb, HBg2, HGFAC, LAMP2, MASP2, MST1, P116, PRDX2, SHBG, STXB2, TNXB |
| GO:0005576 | extracellular region      | 3.66E-06 | 6.66E-08            | 11               | HBb, HBg2, HGFAC, LAMP2, MASP2, MST1, P116, PRDX2, SHBG, STXB2, TNXB |

|            |                                |             |          |   |                                              |
|------------|--------------------------------|-------------|----------|---|----------------------------------------------|
| GO:0031838 | haptoglobin-hemoglobin complex | 0.000701262 | 1.28E-05 | 2 | HBB, HBG2                                    |
| GO:0005833 | hemoglobin complex             | 0.000856837 | 1.56E-05 | 2 | HBB, HBG2                                    |
| GO:0070062 | extracellular exosome          | 0.00190081  | 3.46E-05 | 7 | HBB, LAMP2, MASP2, PRDX2, SHBG, STXBP2, TNXB |
| GO:1903561 | extracellular vesicle          | 0.00202999  | 3.69E-05 | 7 | HBB, LAMP2, MASP2, PRDX2, SHBG, STXBP2, TNXB |
| GO:0043230 | extracellular organelle        | 0.00206181  | 3.75E-05 | 7 | HBB, LAMP2, MASP2, PRDX2, SHBG, STXBP2, TNXB |
| GO:0070820 | tertiary granule               | 0.00490937  | 8.93E-05 | 3 | HBB, LAMP2, STXBP                            |

Number of upregulated proteins equal to 11  
The result table shows 11 genes annotated  
p-value <=0.01

Supplementary Table S6 -Result table of gene ontology analysis for upregulated proteins considering the biological process as classifier.

| GO ID      | Term                                | P-value     | Uncorrected P-value | Number annotated | Annotated genes  |
|------------|-------------------------------------|-------------|---------------------|------------------|------------------|
| GO:0042744 | hydrogen peroxide catabolic process | 0.000115596 | 6.39E-07            | 3                | HBB, HBG2, PRDX2 |
| GO:0042743 | hydrogen peroxide metabolic process | 0.00064132  | 3.54E-06            | 3                | HBB, HBG2, PRDX2 |
| GO:0017001 | antibiotic catabolic process        | 0.000713437 | 3.94E-06            | 3                | HBB, HBG2, PRDX2 |
| GO:0051187 | cofactor catabolic process          | 0.00105546  | 5.83E-06            | 3                | HBB, HBG2, PRDX2 |
| GO:0098869 | cellular oxidant detoxification     | 0.00380292  | 2.10E-05            | 3                | HBB, HBG2, PRDX2 |
| GO:0015671 | oxygen transport                    | 0.00466117  | 2.58E-05            | 2                | HBB, HBG2        |
| GO:1990748 | cellular detoxification             | 0.00518364  | 2.86E-05            | 3                | HBB, HBG2, PRDX2 |
| GO:0098754 | detoxification                      | 0.00846904  | 4.68E-05            | 3                | HBB, HBG2, PRDX2 |
| GO:0015669 | gas transport                       | 0.00874556  | 4.83E-05            | 2                | HBB, HBG2        |

Number of upregulated proteins equal to 11  
The result table shows 11 genes annotated  
p-value <=0.01

Supplementary Table S7 -Result table of gene ontology analysis for upregulated proteins considering the molecular function as classifier.

| GO ID      | Term                                                    | P-value     | Uncorrected P-value | Number annotated | Annotated genes    |
|------------|---------------------------------------------------------|-------------|---------------------|------------------|--------------------|
| GO:0004601 | peroxidase activity                                     | 9.62E-05    | 2.83E-06            | 3                | HBB, HBG2, PRDX2   |
| GO:0031721 | hemoglobin alpha binding                                | 9.65E-05    | 2.84E-06            | 2                | HBB, HBG2          |
| GO:0016684 | oxidoreductase activity, acting on peroxide as acceptor | 0.000120469 | 3.54E-06            | 3                | HBB, HBG2, PRDX2   |
| GO:0030492 | hemoglobin binding                                      | 0.000346912 | 1.02E-05            | 2                | HBB, HBG2          |
| GO:0031720 | haptoglobin binding                                     | 0.000346912 | 1.02E-05            | 2                | HBB, HBG2          |
| GO:0016209 | antioxidant activity                                    | 0.000440705 | 1.30E-05            | 3                | HBB, HBG2, PRDX2   |
| GO:0005344 | oxygen carrier activity                                 | 0.000750726 | 2.21E-05            | 2                | HBB, HBG2          |
| GO:0004252 | serine-type endopeptidase activity                      | 0.00303488  | 8.93E-05            | 3                | HGFAC, MASP2, MST1 |
| GO:0008236 | serine-type peptidase activity                          | 0.00440731  | 0.000129627         | 3                | HGFAC, MASP2, MST1 |
| GO:0017171 | serine hydrolase activity                               | 0.00469367  | 0.000138049         | 3                | HGFAC, MASP2, MST1 |
| GO:0019825 | oxygen binding                                          | 0.0056884   | 0.000167306         | 2                | HBB, HBG2          |

Number of upregulated proteins equal to 11  
The result table shows 11 genes annotated  
p-value <=0.01

-Supplementary Table S8-

Table S8. Summary of mutations in *ATP7A* gene

| Exon | Nucleotide                | Location in protein domains (ATP7A) | Phenotype | Population/<br>number of cases | References |
|------|---------------------------|-------------------------------------|-----------|--------------------------------|------------|
| 3    | c.611_612AA del           | Near the MBD2                       | MD        |                                |            |
| 4    | c.818_819ATdel            | Between the MBD2 and MBD3           | MD        |                                |            |
| 4    | c.979A del                | Near the MBD3                       | MD        |                                |            |
| 4    | c.1168G del               | Between the MBD3 and MBD4           | MD        |                                |            |
| 9    | c.2157_2158A T in         | TM1                                 | MD        |                                |            |
| 10   | c.2499_2500C ins          | TM4                                 | MD        |                                |            |
| 18   | c.3778G del               | Between the P-domain and N-domain   | MD        |                                |            |
| 18   | c.3802T del               | Between the P-domain and N-domain   | MD        | Japanese / 66                  | [1]        |
| 4    | c.1152A>T                 | Between the MBD3 and MBD4           | MD        |                                |            |
| 4    | c.1175A>G                 | Between the MBD3 and MBD4           | MD        |                                |            |
| 13   | c.2828A>T                 | Near the A-domain                   | MD        |                                |            |
| 15   | c.3102G>A                 | TM6                                 | MD        |                                |            |
| 16   | c.3282C>T                 | P-domain                            | MD        |                                |            |
| 20   | c.4060C>G                 | N-domain                            | MD        |                                |            |
| 23   | c.A4394G                  | Near the TM8                        | MD        |                                |            |
| 4    | c.1403G>T                 | Near the MBD4                       | MD        |                                |            |
| 5    | c.1618C>A                 | Near the MBD5                       | MD        |                                |            |
| 6    | c.1793G>T                 | Between the MBD5 and MBD6           | MD        |                                |            |
| 15   | c.2972C>A                 | TM6                                 | dHMN      | Italian / 2                    | [2]        |
| 21   | c.4067G>C                 | TM7                                 | MD        | American / 1                   | [3]        |
| 22   | c.4222A > T               | TM8                                 | OHS       | Italian / 1                    | [4]        |
| 4    | c.907C > T                | MBD3                                | MD        |                                |            |
| 5    | c.1519G > T               | MBD5                                | MD        |                                |            |
| 7    | c.1747G > T               | MBD6                                | MD        |                                |            |
| 15   | c.3067_3096 del 30        | P-domain                            | MD        |                                |            |
| 21   | c.4108_4113 del ATTCCC    | TM7                                 | MD        |                                |            |
| 5    | c.1355_1356 del TA        | MBD4                                | MD        | Italian / 25                   | [5]        |
| 3    | c.467 del A               | MBD1                                | MD        |                                |            |
| 4    | c.865_868 del AAAT ins 24 | MBD3                                | MD        |                                |            |
| 10   | c.2313 dup G              | Between TM3 and TM4                 | MD        |                                |            |
| 18   | c.3539 T > A              | N-domain                            | MD        |                                |            |

|    |             |          |    |                |          |
|----|-------------|----------|----|----------------|----------|
| 22 | c.4222A > T | TM8      | MD |                |          |
| -  | c.2179G > A | -        | MD | Chinese / 24   | [6]      |
| -  | c.3352G>A   | N-domain | MD | Japanese / 11  | [7]      |
| 3  | c.532G>T    | MBD2     | MD | European / 517 | [8]      |
| 3  | c.589C>T    | MBD2     | MD | American / 24  | [9]      |
| 3  | c.601C>T    | MBD2     | MD | American / 1   | [10]     |
| 5  | c.1460C>A   | MBD5     | MD | Japanese / 17  | [11]     |
| 6  | c.1585G>T   | MBD5     | MD | Japanese / 35  | [12]     |
| 6  | c.1639C>T   | MBD5     | MD | European / 341 | [13]     |
| 7  | c.1734C>A   | MBD6     | MD | American / 41  | [14]     |
| 8  | c.1874T>R   | MBD6     | MD | American / 24  | [9]      |
| 12 | c.2531G>A   | A-domain | MD |                |          |
| 12 | c.2579G>T   | A-domain | MD |                |          |
| 12 | c.2618T>G   | A-domain | MD |                |          |
| 12 | c.2626G>C   | A-domain | MD | *              | [15]     |
| 13 | c.2771G>A   | A-domain | MD |                |          |
| 15 | c.2998T>C   | TM6      | MD |                |          |
| 16 | c.3131A>G   | P-domain | MD |                |          |
| 20 | c.3844A>G   | P-domain | MD |                |          |
| 20 | c.3974C>T   | P-domain | MD | European / 2   | [16]     |
| 15 | c.3043G>A   | TM6      | MD |                |          |
| 8  | c.1885G>C   | MBD1     | MD |                |          |
| 9  | c.2059A>G   | TM1      | MD |                |          |
| 10 | c.2179G>A   | TM1      | MD |                |          |
| 12 | c.2609A>G   | P-domain | MD |                |          |
| 15 | c.3013G>A   | N-domain | MD |                |          |
| 15 | c.3043G>A   | N-domain | MD | European / 40  | [17]     |
| 16 | c.3143C>T   | P-domain | MD |                |          |
| 16 | c.3293A>C   | P-domain | MD |                |          |
| 22 | c.4177A>G   | TM8      | MD |                |          |
| 4  | c.721C>T    | MBD2     | MD |                |          |
| 15 | c.2944G>T   | N-domain | MD |                |          |
| 21 | c.4085C>A   | TM7      | MD | *              | [15]     |
| 22 | c.4117G>C   | TM7      | MD | *              | [18]     |
| 22 | c.4118C>T   | TM7      | MD |                |          |
| 22 | c.4190C>T   | TM8      | MD | American / 36  | [19]     |
| 22 | c.4190C>T   | TM8      | MD | *              | [15, 20] |

Menkes disease (MD); Occipital horn syndrome (OHS); Distal hereditary motor neuropathy (dHMN); Del: deletion; In: insertion; MBD: heavy metal binding domain (Cu, 1-6); TM: transmembrane domain (1-8); A domain: activation domain; P domain: phosphorylation domain and; N domain: nucleotide domain. \*Non reported

## References

1. Fujisawa, C., et al., *ATP7A mutations in 66 Japanese patients with Menkes disease and carrier detection: A gene analysis*. *Pediatr Int*, 2019. **61**(4): p. 345-350.
2. Gualandi, F., et al., *Report of a novel ATP7A mutation causing distal motor neuropathy*. *Neuromuscul Disord*, 2019. **29**(10): p. 776-785.
3. Caicedo-Herrera, G., et al., *Novel ATP7A gene mutation in a patient with Menkes disease*. *Appl Clin Genet*, 2018. **11**: p. 151-155.
4. Bonati, M.T., et al., *A novel nonsense ATP7A pathogenic variant in a family exhibiting a variable occipital horn syndrome phenotype*. *Mol Genet Metab Rep*, 2017. **13**: p. 14-17.
5. de Gemmis, P., et al., *13 novel putative mutations in ATP7A found in a cohort of 25 Italian families*. *Metab Brain Dis*, 2017. **32**(4): p. 1173-1183.
6. Cao, B., et al., *Identification of novel ATP7A mutations and prenatal diagnosis in Chinese patients with Menkes disease*. *Metab Brain Dis*, 2017. **32**(4): p. 1123-1131.
7. Kim, J.H., et al., *Novel mutations and clinical outcomes of copper-histidine therapy in Menkes disease patients*. *Metab Brain Dis*, 2015. **30**(1): p. 75-81.
8. Moller, L.B., et al., *Clinical expression of Menkes disease in females with normal karyotype*. *Orphanet J Rare Dis*, 2012. **7**: p. 6.
9. Kaler, S.G., et al., *Molecular correlates of epilepsy in early diagnosed and treated Menkes disease*. *J Inherit Metab Dis*, 2010. **33**(5): p. 583-9.
10. Kaler, S.G., et al., *Translational read-through of a nonsense mutation in ATP7A impacts treatment outcome in Menkes disease*. *Ann Neurol*, 2009. **65**(1): p. 108-13.
11. Gu, Y.H., et al., *ATP7A gene mutations in 16 patients with Menkes disease and a patient with occipital horn syndrome*. *Am J Med Genet*, 2001. **99**(3): p. 217-22.
12. Gu, Y.H., H. Kodama, and T. Kato, *Congenital abnormalities in Japanese patients with Menkes disease*. *Brain Dev*, 2012. **34**(9): p. 746-9.
13. Tumer, Z., *An overview and update of ATP7A mutations leading to Menkes disease and occipital horn syndrome*. *Hum Mutat*, 2013. **34**(3): p. 417-29.
14. Tumer, Z., et al., *Identification of point mutations in 41 unrelated patients affected with Menkes disease*. *Am J Hum Genet*, 1997. **60**(1): p. 63-71.
15. Moller, L.B., et al., *Identification and analysis of 21 novel disease-causing amino acid substitutions in the conserved part of ATP7A*. *Hum Mutat*, 2005. **26**(2): p. 84-93.
16. Borm, B., et al., *Variable clinical expression of an identical mutation in the ATP7A gene for Menkes disease/occipital horn syndrome in three affected males in a single family*. *J Pediatr*, 2004. **145**(1): p. 119-21.
17. Moizard, M.P., et al., *Twenty-five novel mutations including duplications in the ATP7A gene*. *Clin Genet*, 2011. **79**(3): p. 243-53.
18. Gourdon, P., et al., *Crystal structure of a copper-transporting PIB-type ATPase*. *Nature*, 2011. **475**(7354): p. 59-64.
19. Skjorringe, T., et al., *Characterization of ATP7A missense mutants suggests a correlation between intracellular trafficking and severity of Menkes disease*. *Sci Rep*, 2017. **7**(1): p. 757.
20. de Bie, P., et al., *Molecular pathogenesis of Wilson and Menkes disease: correlation of mutations with molecular defects and disease phenotypes*. *J Med Genet*, 2007. **44**(11): p. 673-88.
